# Supplementary material for: Synthesis and characterisation of the complete series of B–N analogues of triptycene
Source: Royal Society of Chemistry journal article supplement (doi:10.1039/c4dt00442f), 2014-02-27
Supplement: c4dt00442f1.pdf [file c4dt00442f1.pdf]

**Supporting Information**  
**for the paper**

**Synthesis and characterisation of the complete series of  
B–N analogues of triptycene**

Ömer Seven, Sebastian Popp, Michael Bolte, Hans-Wolfram Lerner, Matthias Wagner\*

*Institut für Anorganische Chemie, J.W. Goethe-Universität Frankfurt, Max-von-Laue-  
Strasse 7, D-60438 Frankfurt (Main), Germany.*

*E-mail: [Matthias.Wagner@chemie.uni-frankfurt.de](mailto:Matthias.Wagner@chemie.uni-frankfurt.de)*

**Content:**

- 1) Syntheses of 3c, 3d, 3e, K[8] (R = *p*-Me<sub>3</sub>SiC<sub>6</sub>H<sub>4</sub>; *p*-IC<sub>6</sub>H<sub>4</sub>), 14c and 14d**
- 2) Plots of the <sup>13</sup>C{<sup>1</sup>H} NMR spectra of 3a, 3c, 3d, [4a]Br, [4c]Br, [4e]Br, 14b, 14c and 14d**
- 3) Decomposition experiments of 3b, [4a]Br and [4b]Br in CD<sub>3</sub>OD and [4d]Br in CH<sub>3</sub>OH**
- 4) X-ray crystal structure analyses of 3c, 3d, 3e, 3f·OEt<sub>2</sub> and 12a**

### 1) Syntheses of **3c**, **3d**, **3e**, **K[8]** (**R** = *p*-Me<sub>3</sub>SiC<sub>6</sub>H<sub>4</sub>; *p*-IC<sub>6</sub>H<sub>4</sub>), **14c** and **14d**

**Synthesis of 3c.** A Schlenk flask was charged with Li<sub>2</sub>[**7**]·OEt<sub>2</sub> (25 mg, 0.13 mmol) and 3,5-dimethylpyrazole (25 mg, 0.26 mmol). Et<sub>2</sub>O (15 mL) was added at rt with stirring, whereupon vigorous gas evolution (H<sub>2</sub>) was observed, which lasted for approximately 2 min. After 30 min, neat Me<sub>3</sub>SiCl (0.1 mL, 0.08 g, 0.8 mmol) was added to the colourless solution to give a white suspension. Stirring was continued for 12 h, the formed LiCl was removed by filtration and the filtrate was evaporated under vacuum to yield a colourless solid. Single crystals were grown by gas-phase diffusion of cyclohexane into a solution of **3c** in C<sub>6</sub>H<sub>6</sub>. Yield: 27 mg (71%). <sup>1</sup>H NMR (400.1 MHz, C<sub>6</sub>D<sub>6</sub>): δ = 7.99-7.93 (2 H, m, H-3,6), 7.32-7.28 (2 H, m, H-4,5), 5.19 (2 H, s, pzH-4), 4.70 (2 H, br q, BH), 2.06 (12 H, s, Me); <sup>13</sup>C{<sup>1</sup>H} NMR (75.4 MHz, C<sub>6</sub>D<sub>6</sub>): δ = 143.0 (pzC-3,5), 130.3 (C-3,6), 126.0 (C-4,5), 105.1 (pzC-4), 11.4 (Me), n.o. (CB); <sup>11</sup>B NMR (96.3 MHz, C<sub>6</sub>D<sub>6</sub>): δ = -7.0 (d, <sup>1</sup>J<sub>B,H</sub> = 98 Hz); <sup>11</sup>B{<sup>1</sup>H} NMR (96.3 MHz, C<sub>6</sub>D<sub>6</sub>): δ = -7.0 (*h*<sub>1/2</sub> = 120 Hz); MS (ESI<sup>+</sup>): *m/z* 291.3 ([M + H]<sup>+</sup>, 100%); HRMS (MALDI-TOF): *m/z* = 291.19474 ([M + H]<sup>+</sup>, calcd 291.19468).

**Synthesis of 3d.** A solution of 3,5-di(*tert*-butyl)pyrazole (47 mg, 0.26 mmol) in Et<sub>2</sub>O (10 mL) was added dropwise with stirring at rt to a solution of Li<sub>2</sub>[**7**]·OEt<sub>2</sub> (25 mg, 0.13 mmol) in Et<sub>2</sub>O (10 mL); the reaction proceeds with evolution of H<sub>2</sub>. After 30 min, neat Me<sub>3</sub>SiCl (0.1 mL, 0.08 g, 0.8 mmol) was added to the clear colourless solution to give a white suspension. Stirring was continued for 12 h, the formed LiCl was removed by filtration and the filtrate was evaporated under vacuum to yield a colourless solid. Single crystals were obtained as colourless plates by slow evaporation of a solution of **3d** in Et<sub>2</sub>O. Yield: 51 mg (85%). <sup>1</sup>H NMR (500.2 MHz, C<sub>6</sub>D<sub>6</sub>): δ = 7.81-7.77 (2 H, m, H-3,6), 7.27-7.23 (2 H, m, H-4,5), 5.88 (2 H, s, pzH-4), 5.32 (2 H, br, BH), 1.44 (36 H, s, *t*Bu); <sup>13</sup>C{<sup>1</sup>H} NMR (125.8 MHz, C<sub>6</sub>D<sub>6</sub>): δ = 156.8 (pzC-3,5), 129.4 (C-3,6), 125.7 (C-4,5), 102.1 (pzC-4), 32.3 (C(CH<sub>3</sub>)<sub>3</sub>), 30.6 (CH<sub>3</sub>), n.o. (CB); <sup>11</sup>B NMR (160.5 MHz, C<sub>6</sub>D<sub>6</sub>): δ = -4.0 (*h*<sub>1/2</sub> = 350 Hz); MS (ESI<sup>+</sup>): *m/z* 459.5 ([M + H]<sup>+</sup>, 100%); HRMS (MALDI-TOF): *m/z* = 459.38367 ([M + H]<sup>+</sup>, calcd 459.38248).

**Synthesis of 3e.** A Schlenk flask was charged with Li<sub>2</sub>[**7**]·OEt<sub>2</sub> (40 mg, 0.21 mmol) and 3,5-bis(trifluoromethyl)pyrazole (85 mg, 0.42 mmol). Et<sub>2</sub>O (10 mL) was added at rt with stirring, whereupon vigorous gas evolution (H<sub>2</sub>) was observed, which lasted for approximately 2 min. After 30 min, neat Me<sub>3</sub>SiCl (0.1 mL, 0.08 g, 0.8 mmol) was added to the colourless solution to give a white suspension. Stirring was continued for 15 h, the formed LiCl was removed by



**Synthesis of *p*-IC<sub>6</sub>H<sub>4</sub>B(NMe<sub>2</sub>)<sub>2</sub>.** The compound was synthesised according to the protocol described above for *p*-Me<sub>3</sub>SiC<sub>6</sub>H<sub>4</sub>B(NMe<sub>2</sub>)<sub>2</sub> from Me<sub>3</sub>SiNMe<sub>2</sub> (1.8 mL, 1.3 g, 11 mmol) and *p*-IC<sub>6</sub>H<sub>4</sub>BBr<sub>2</sub><sup>3S</sup> (2.1 g, 5.6 mmol). Yield: 1.6 g (94%). <sup>1</sup>H NMR (300.0 MHz, C<sub>6</sub>D<sub>6</sub>): δ = 7.61 (2 H, d, <sup>3</sup>J<sub>H,H</sub> = 8.2 Hz, ArH), 6.95 (2 H, d, <sup>3</sup>J<sub>H,H</sub> = 8.2 Hz, ArH), 2.48 (12 H, s, NMe<sub>2</sub>); <sup>13</sup>C{<sup>1</sup>H} NMR (75.4 MHz, C<sub>6</sub>D<sub>6</sub>): δ = 137.1 (ArC), 135.8 (ArC), 94.5 (CI), 40.9 (NMe<sub>2</sub>), n.o. (CB); <sup>11</sup>B NMR (96.3 MHz, C<sub>6</sub>D<sub>6</sub>): δ = 32.3 (*h*<sub>1/2</sub> = 130 Hz).

#### Step b)

**Synthesis of K[*p*-Me<sub>3</sub>SiC<sub>6</sub>H<sub>4</sub>Bpz<sub>3</sub>].** *p*-Me<sub>3</sub>SiC<sub>6</sub>H<sub>4</sub>B(NMe<sub>2</sub>)<sub>2</sub> (2.68 g, 10.8 mmol), Hpz (1.47 g, 21.6 mmol) and Kpz (1.15 g, 10.8 mmol) were suspended in toluene (20 mL). The suspension was stirred for 24 h at rt, whereupon the potassium tris(pyrazol-1-yl)borate gradually precipitated. The colourless precipitate was collected on a frit, washed with toluene (6 × 5 mL) and *n*-pentane (6 × 5 mL) and dried under reduced pressure. Yield: 3.5 g (81%). <sup>1</sup>H NMR (500.2 MHz, *d*<sub>8</sub>-THF): δ = 7.43 (3 H, d, <sup>3</sup>J<sub>H,H</sub> = 1.0 Hz, pzH-3 or pzH-5), 7.34 (3 H, d, <sup>3</sup>J<sub>H,H</sub> = 2.0 Hz, pzH-3 or pzH-5), 7.32 (2 H, d, <sup>3</sup>J<sub>H,H</sub> = 8.0 Hz, ArH), 6.93 (2 H, d, <sup>3</sup>J<sub>H,H</sub> = 8.0 Hz, ArH), 5.99 (3 H, vtr, pzH-4), 0.23 (9 H, s, SiMe<sub>3</sub>); <sup>13</sup>C{<sup>1</sup>H} NMR (125.8 MHz, *d*<sub>8</sub>-THF): δ = 139.4 (pzC-3 or pzC-5), 137.5 (CSi), 135.9 (pzC-3 or pzC-5), 134.5 (ArC), 132.4 (ArC), 103.0 (pzC-4), -0.8 (SiMe<sub>3</sub>), n.o. (CB); <sup>11</sup>B{<sup>1</sup>H} NMR (160.5 MHz, *d*<sub>8</sub>-THF): δ = 1.7 (*h*<sub>1/2</sub> = 130 Hz); <sup>29</sup>Si INEPT NMR (99.4 MHz, *d*<sub>8</sub>-THF): δ = -5.3; MS (ESI<sup>-</sup>): *m/z* 361.3 ([M - K]<sup>-</sup>, 100%); MS (ESI<sup>+</sup>): *m/z* 439.3 ([M + K]<sup>+</sup>, 100%).

**Synthesis of K[*p*-IC<sub>6</sub>H<sub>4</sub>Bpz<sub>3</sub>].** The compound was synthesised according to the protocol described above for K[*p*-Me<sub>3</sub>SiC<sub>6</sub>H<sub>4</sub>Bpz<sub>3</sub>] from *p*-IC<sub>6</sub>H<sub>4</sub>B(NMe<sub>2</sub>)<sub>2</sub> (3.15 g, 10.4 mmol), Hpz (1.42 g, 20.9 mmol) and Kpz (1.11 g, 10.5 mmol). Yield: 4.1 g (87%). <sup>1</sup>H NMR (500.2 MHz, *d*<sub>8</sub>-THF): δ = 7.47 (2 H, d, <sup>3</sup>J<sub>H,H</sub> = 8.0 Hz, ArH), 7.44 (3 H, n.r., pzH-3 or pzH-5), 7.33 (3 H, d, <sup>3</sup>J<sub>H,H</sub> = 2.0 Hz, pzH-3 or pzH-5), 6.70 (2 H, d, <sup>3</sup>J<sub>H,H</sub> = 8.0 Hz, ArH), 6.00 (3 H, vtr, pzH-4); <sup>13</sup>C{<sup>1</sup>H} NMR (125.8 MHz, *d*<sub>8</sub>-THF): δ = 139.5 (pzC-3 or pzC-5), 137.3 (ArC), 136.4 (ArC), 135.8 (pzC-3 or pzC-5), 103.2 (pzC-4), 93.0 (CI), n.o. (CB); <sup>11</sup>B NMR (96.3 MHz, *d*<sub>8</sub>-THF): δ = 1.5 (*h*<sub>1/2</sub> = 90 Hz).

The NMR data of K[*p*-IC<sub>6</sub>H<sub>4</sub>Bpz<sub>3</sub>] are in agreement with those of Na[*p*-IC<sub>6</sub>H<sub>4</sub>Bpz<sub>3</sub>].<sup>3S</sup>

- 1S S. Trofimenko, *J. Am. Chem. Soc.*, 1967, **89**, 3170–3177.
- 2S J. Zagermann, M. C. Kuchta, K. Merz and N. Metzler-Nolte, *Eur. J. Inorg. Chem.*, 2009, 5407–5412.
- 3S D. L. Reger, J. R. Gardinier, M. D. Smith, A. M. Shahin, G. J. Long, L. Rebbouh and F. Grandjean, *Inorg. Chem.*, 2005, **44**, 1852–1866.
- 4S D. Kaufmann, *Chem. Ber.*, 1987, **120**, 901–905.

**Synthesis of 14c.** A Schlenk flask was charged with  $\text{Li}_4[\mathbf{13}] \cdot 3\text{thf}$  (50 mg, 0.13 mmol) and 3,5-dimethylpyrazole (51 mg, 0.53 mmol). Toluene (30 mL) was added at rt with stirring, whereupon a gas ( $\text{H}_2$ ) evolved. After 10 min, neat  $\text{Me}_3\text{SiCl}$  (0.1 mL, 0.08 g, 0.8 mmol) was added to the colourless suspension and stirring was continued for 5 d. All insolubles were collected on a frit, washed with toluene ( $2 \times 5$  mL) and dried under vacuum to obtain a mixture of **14c** and  $\text{LiCl}$ . **14c** is insoluble in hexane,  $\text{C}_6\text{H}_6$ , toluene, and  $\text{Et}_2\text{O}$ ; it is only sparingly soluble in THF,  $\text{CHCl}_3$ , and  $\text{CH}_2\text{Cl}_2$ . The solid mixture of **14c** and  $\text{LiCl}$  was washed with  $\text{H}_2\text{O}$  ( $2 \times 5$  mL) and pentane ( $2 \times 5$  mL) and dried under vacuum (12 h). Yield: 47 mg (70%).  $^1\text{H}$  NMR (500.2 MHz,  $\text{CDCl}_3$ ):  $\delta$  = 7.70 (2 H, s, H-3,6), 5.51 (4 H, s, pzH-4), 4.30\* (4 H, br, BH), 2.27 (24 H, s, Me);  $^{13}\text{C}\{^1\text{H}\}$  NMR (125.8 MHz,  $\text{CDCl}_3$ ):  $\delta$  = 142.5 (pzC-3,5), 132.0 (C-3,6), 104.5 (pzC-4), 11.7 (Me), n.o. (CB);  $^{11}\text{B}$  NMR (96.3 MHz,  $\text{CDCl}_3$ ):  $\delta$  = -7.0 (br,  $h_{1/2}$  = 500 Hz);  $^{11}\text{B}\{^1\text{H}\}$  NMR (96.3 MHz,  $\text{CDCl}_3$ ):  $\delta$  = -7.0 ( $h_{1/2}$  = 400 Hz); MS ( $\text{ESI}^+$ ):  $m/z$  502.9 ( $[\text{M} + \text{H}]^+$ , 100%); HRMS (MALDI-TOF):  $m/z$  = 503.33414 ( $[\text{M} + \text{H}]^+$ , calcd 503.33683). \*This signal sharpens upon  $^{11}\text{B}$  decoupling.

**Synthesis of 14d.** A glass ampoule was charged with  $\text{Li}_4[\mathbf{13}] \cdot 3\text{thf}$  (50 mg, 0.13 mmol), 3,5-di(*tert*-butyl)pyrazole (94 mg, 0.52 mmol), and toluene (20 mL). Neat  $\text{Me}_3\text{SiCl}$  (0.1 mL, 0.08 g, 0.8 mmol) was added to the colourless suspension. The ampoule was sealed under vacuum and stored at 80 °C for 7 d. The ampoule was opened at rt, all insolubles were collected on a frit, washed with toluene ( $2 \times 5$  mL), and dried under vacuum to obtain a mixture of **14d** and  $\text{LiCl}$ . **14d** is insoluble in hexane,  $\text{C}_6\text{H}_6$ , toluene, and  $\text{Et}_2\text{O}$ ; it is only sparingly soluble in THF,  $\text{CHCl}_3$ , and  $\text{CH}_2\text{Cl}_2$ . The solid mixture of **14d** and  $\text{LiCl}$  was washed with  $\text{H}_2\text{O}$  ( $2 \times 5$  mL) and pentane ( $2 \times 5$  mL) and dried under vacuum (12 h). Yield: 77 mg (69%).  $^1\text{H}$  NMR (500.2 MHz,  $\text{CDCl}_3$ ):  $\delta$  = 7.35 (2 H, s, H-3,6), 5.65 (4 H, s, pzH-4), 4.85\* (4 H, br, BH), 1.41 (72 H, s, *t*Bu);  $^{13}\text{C}\{^1\text{H}\}$  NMR (125.8 MHz,  $\text{CDCl}_3$ ):  $\delta$  = 155.5 (pzC-3,5), 130.1 (C-3,6), 100.9 (pzC-4), 32.1 ( $\text{C}(\text{CH}_3)_3$ ), 30.6 ( $\text{CH}_3$ ), n.o. (CB);  $^{11}\text{B}\{^1\text{H}\}$  NMR (96.3 MHz,  $\text{CDCl}_3$ ):  $\delta$  = -3.5 ( $h_{1/2}$  = 800 Hz); MS ( $\text{ESI}^+$ ):  $m/z$  845.5 ( $[\text{M} + \text{Li}]^+$ , 100%),  $m/z$  839.5 ( $[\text{M} + \text{H}]^+$ , 71%); HRMS (MALDI-TOF):  $m/z$  = 838.70550 ( $[\text{M}]^+$ , calcd 838.70580). \*This signal sharpens upon  $^{11}\text{B}$  decoupling.

2) Plots of the  $^{13}\text{C}\{^1\text{H}\}$  NMR spectra of 3a, 3c, 3d, [4a]Br, [4c]Br, [4e]Br, 14b, 14c and 14d

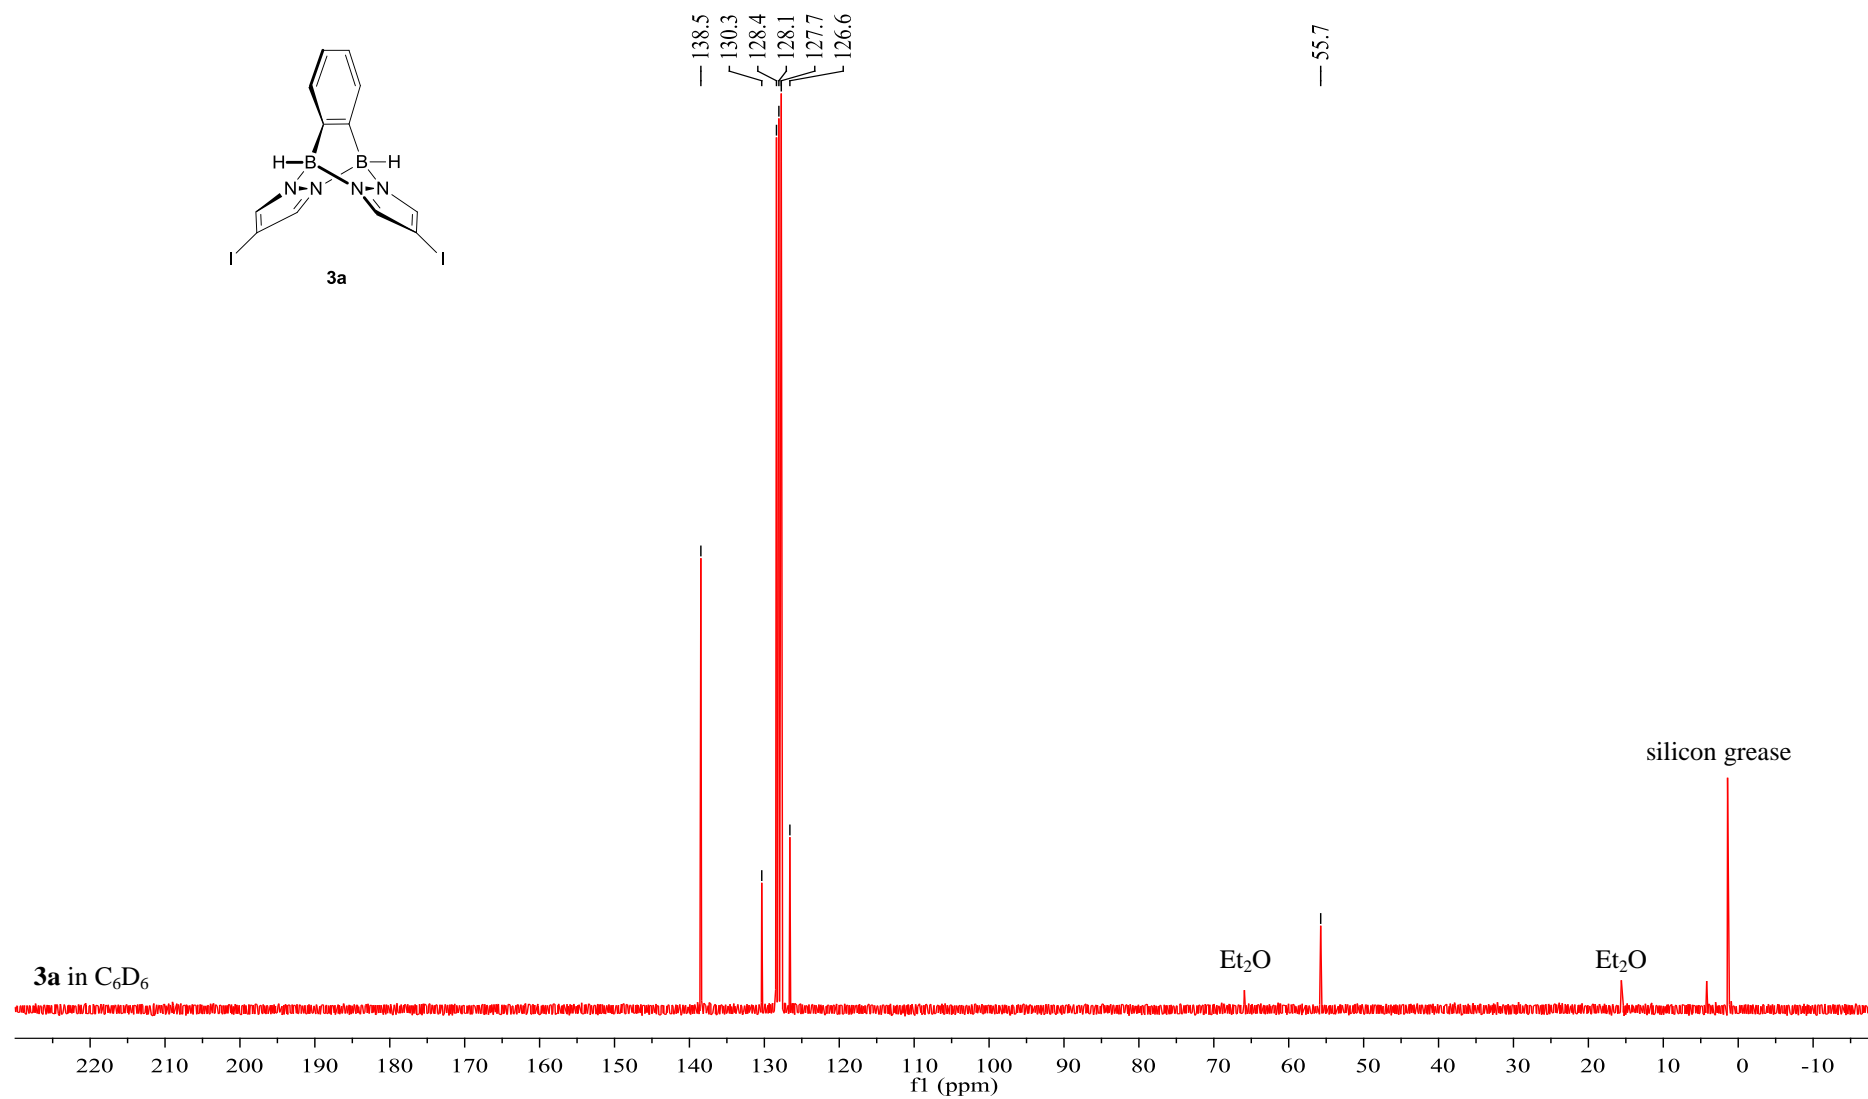

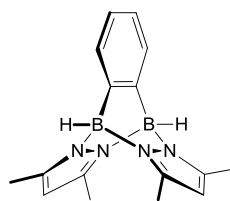

**3c**

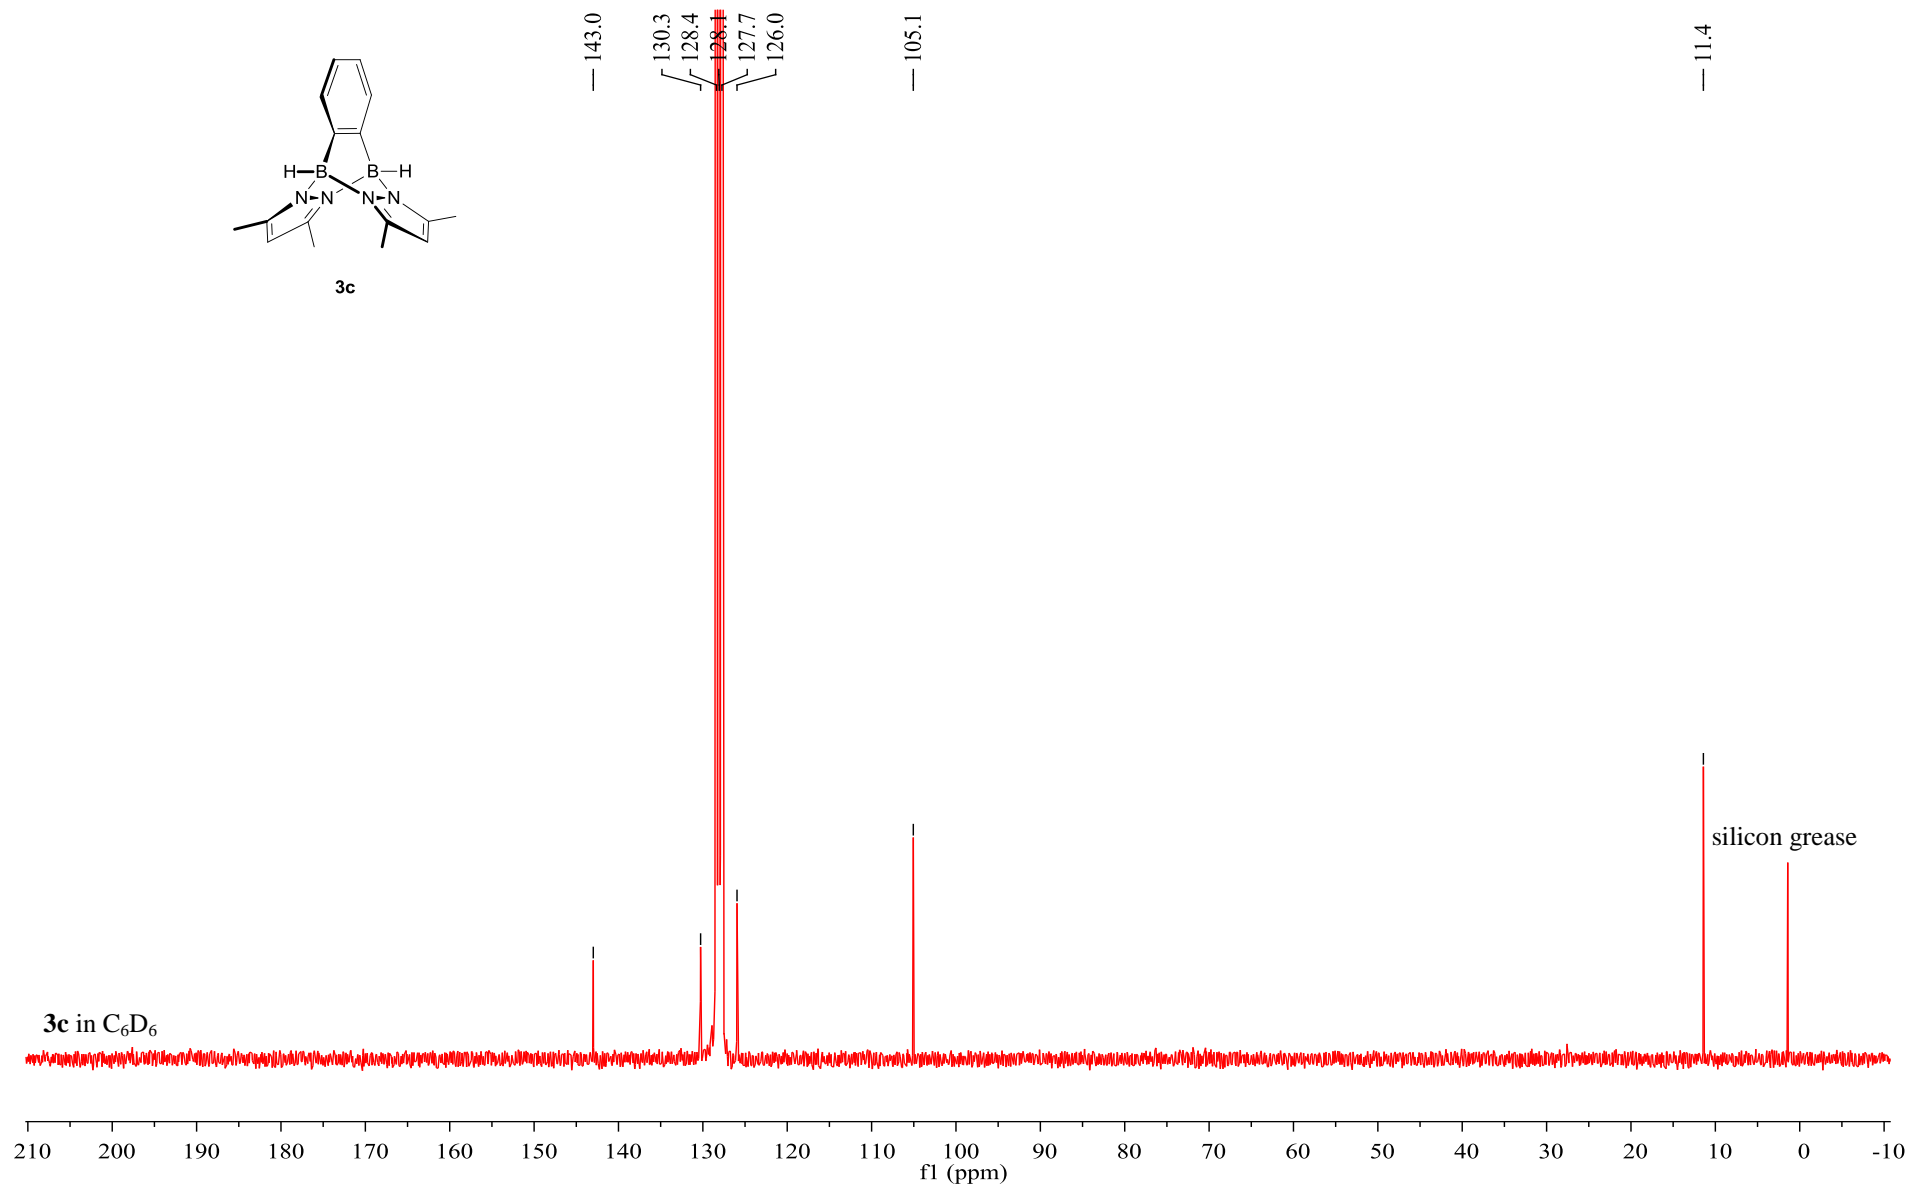

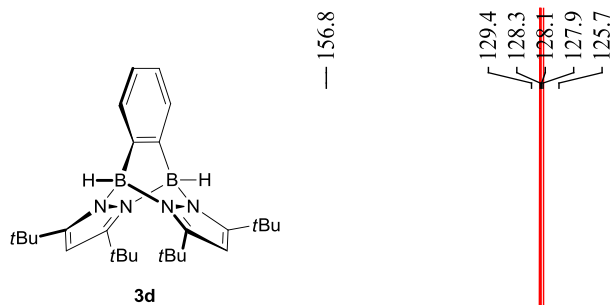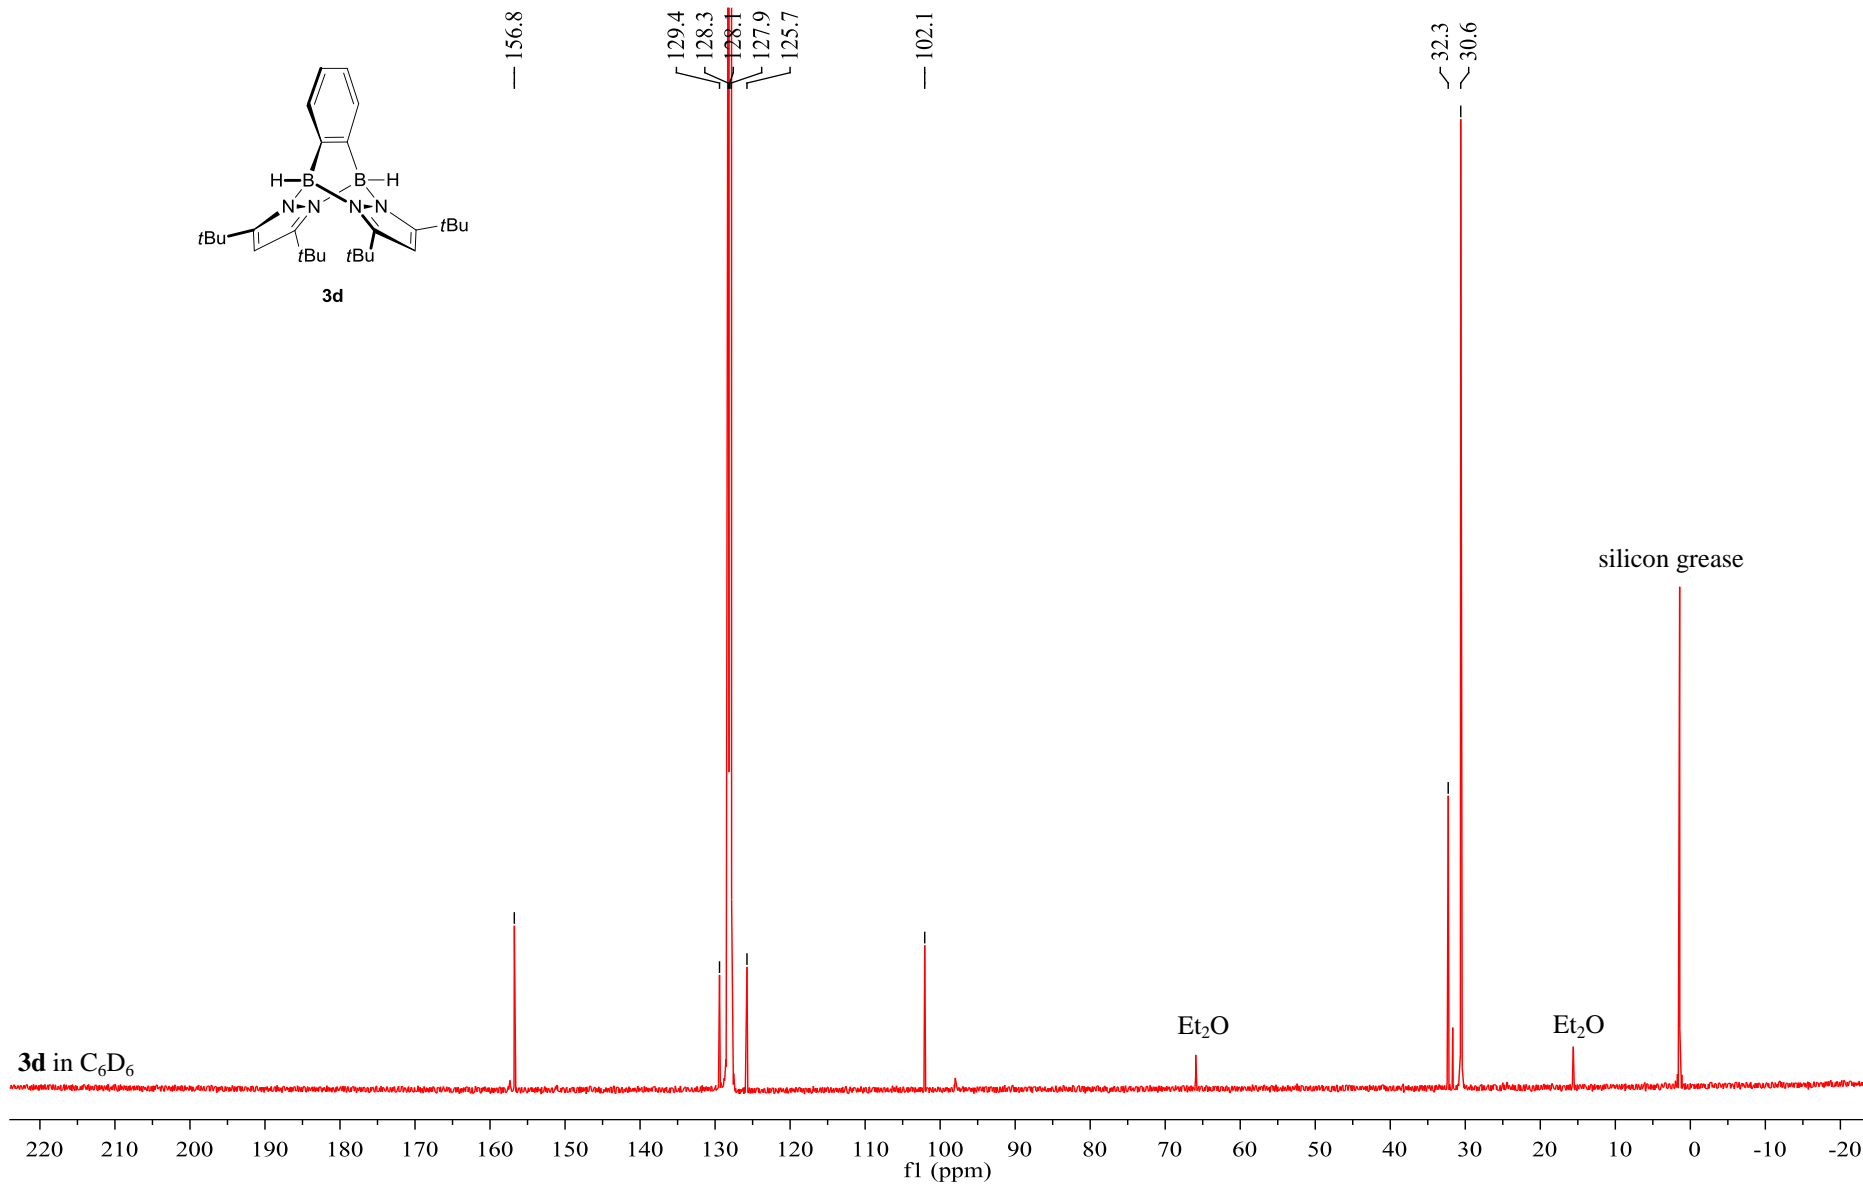



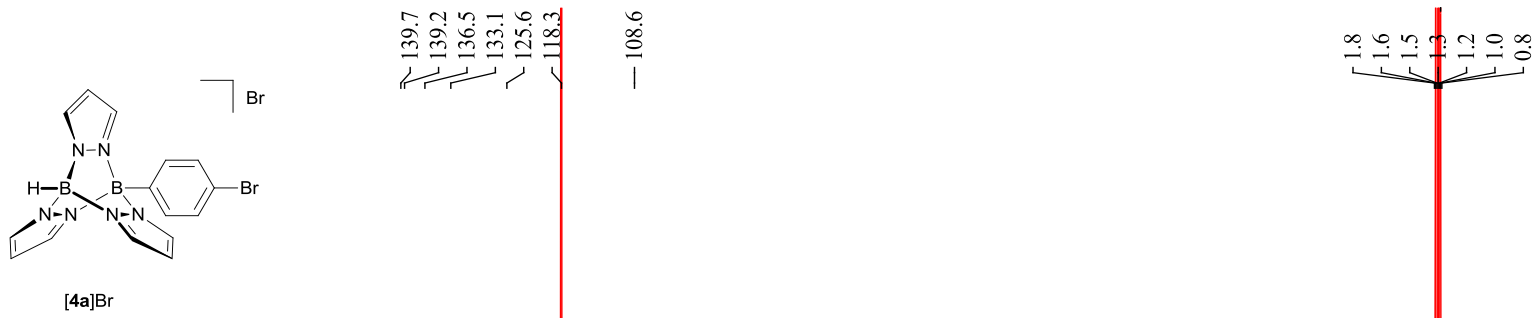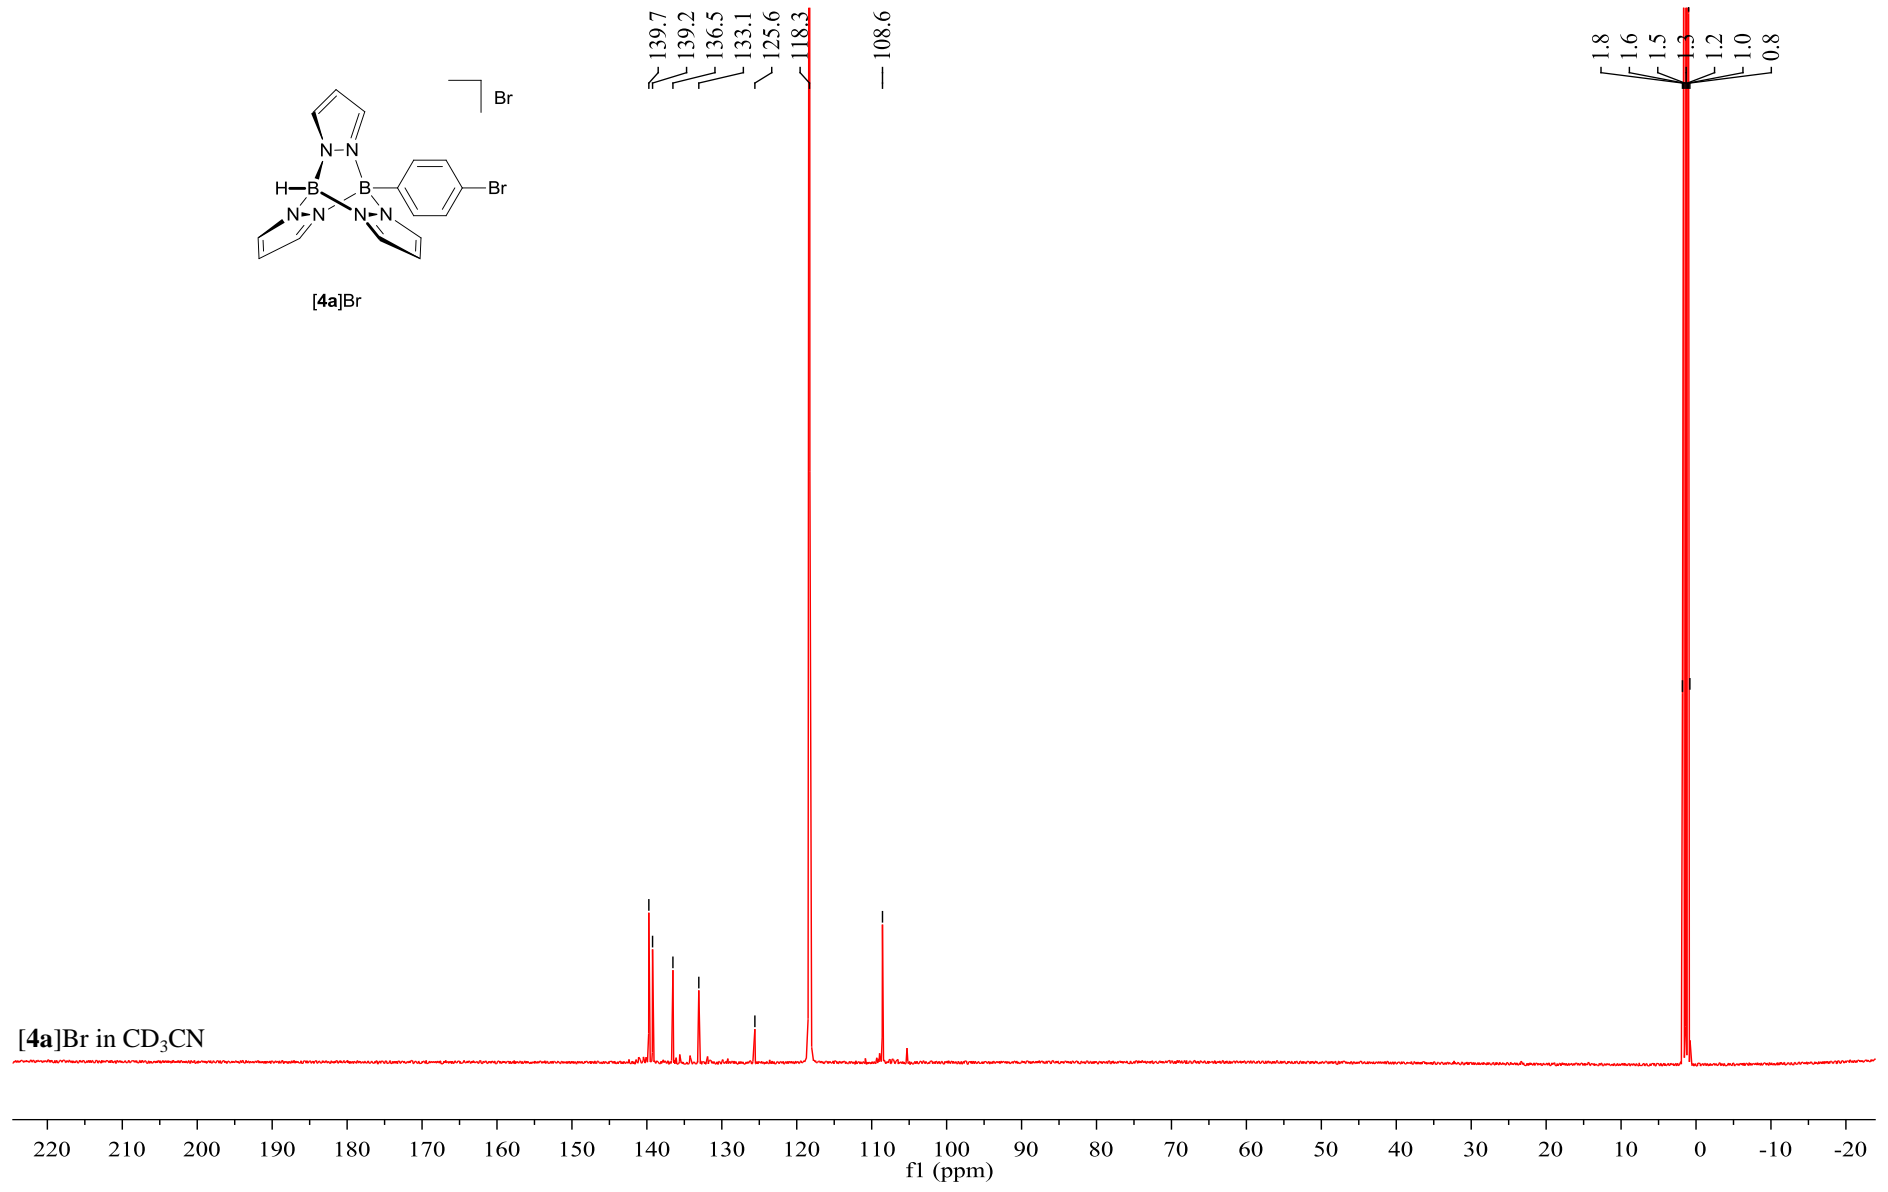

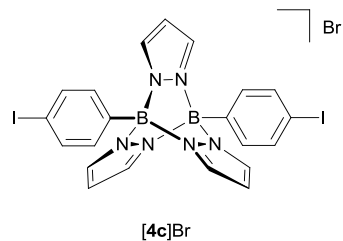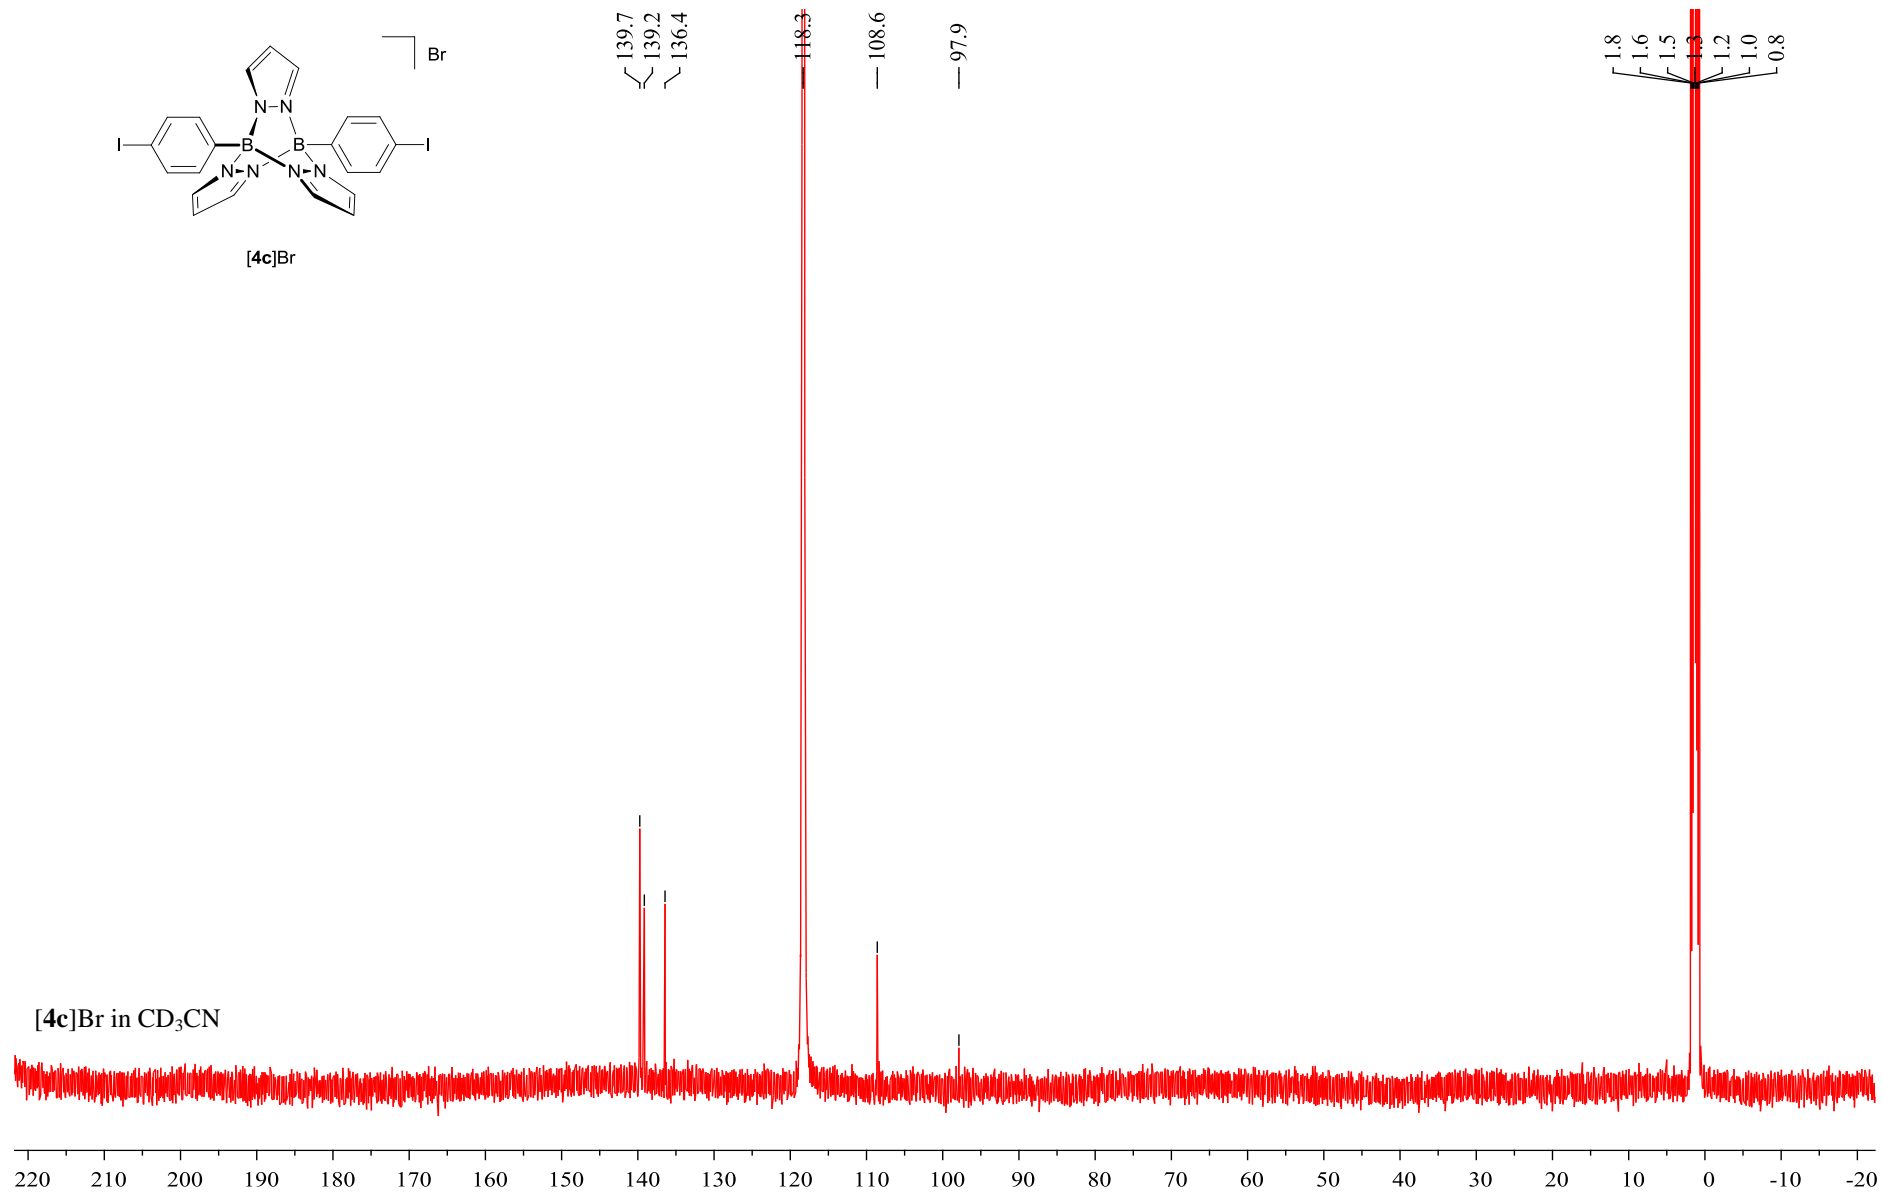

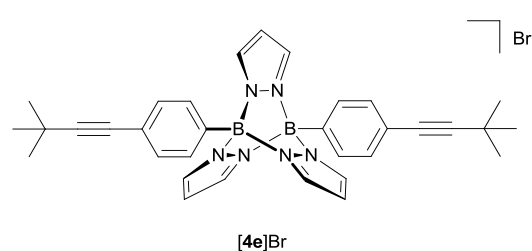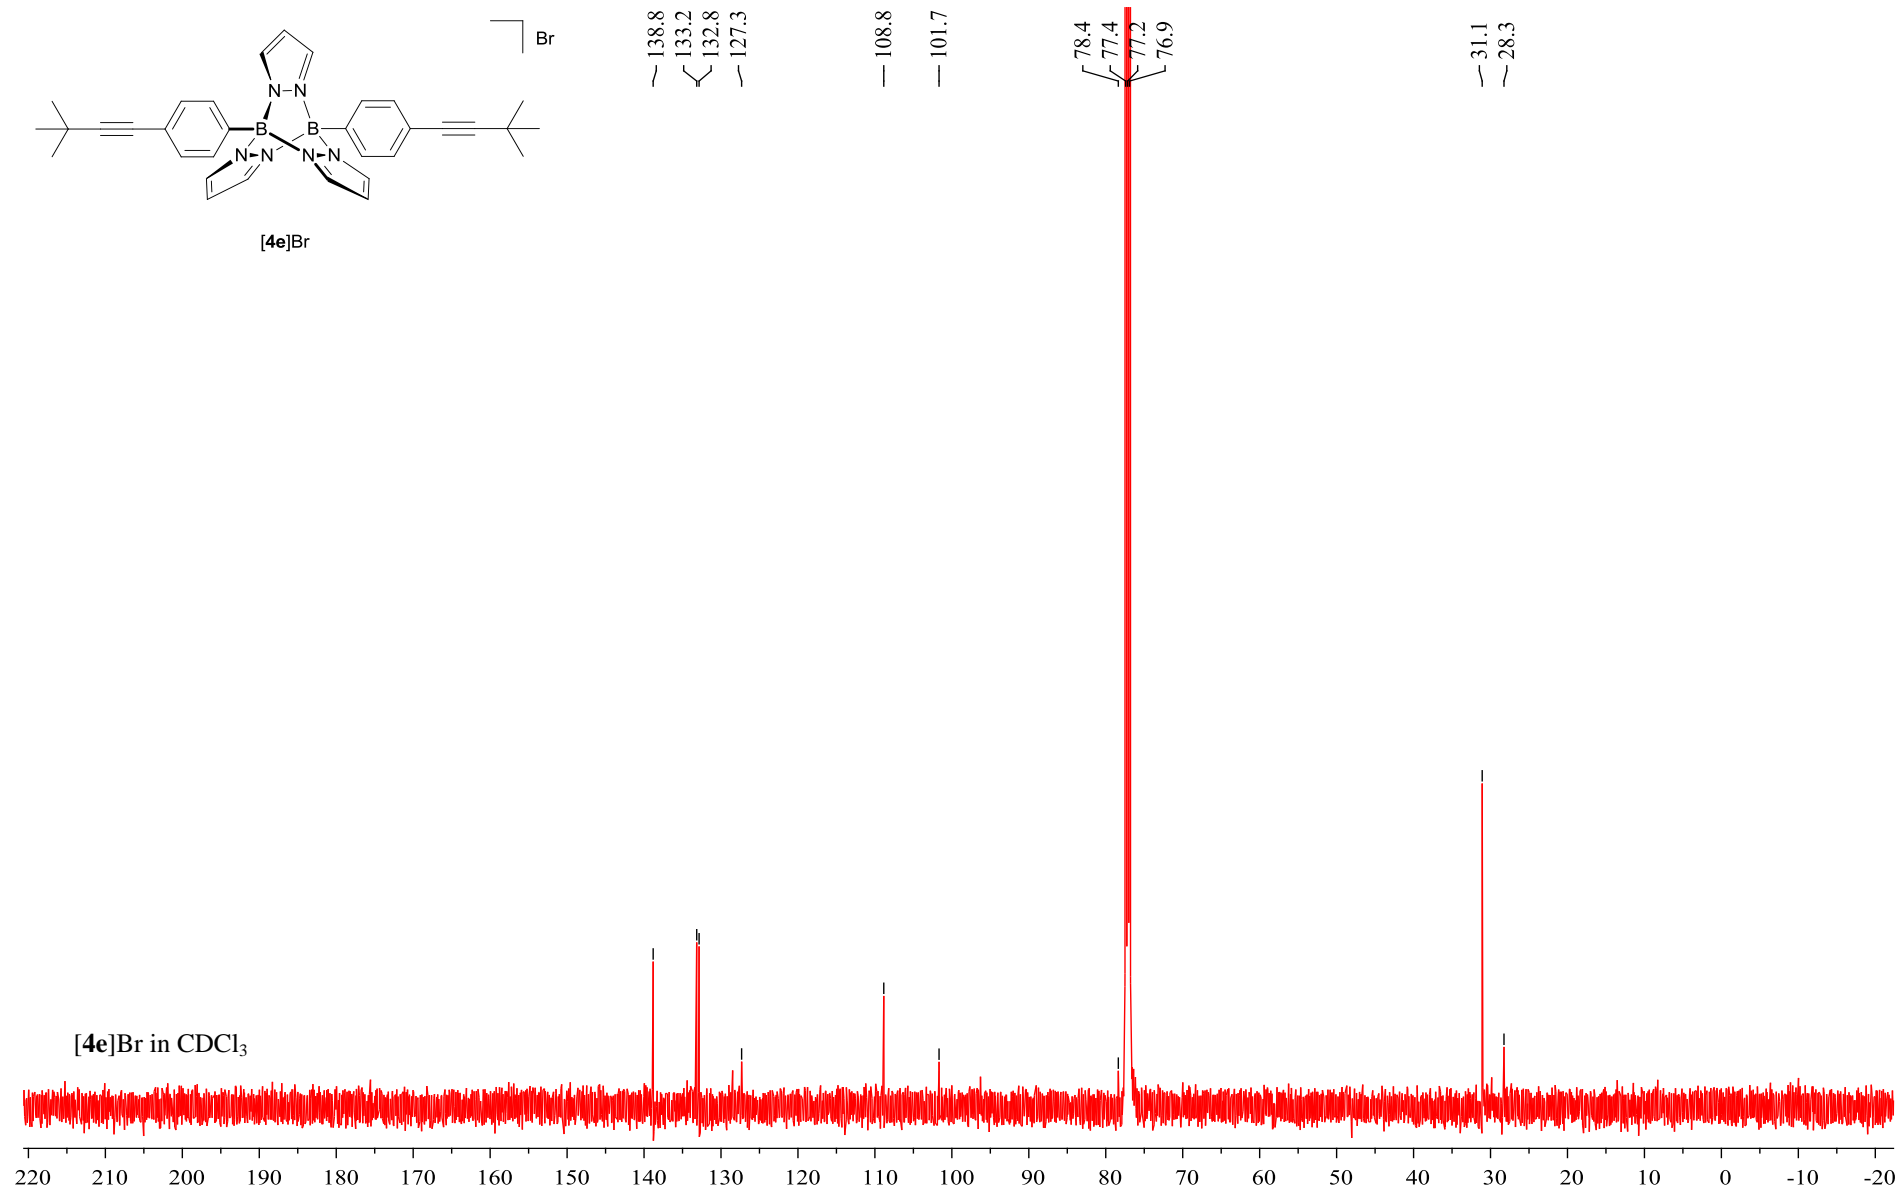

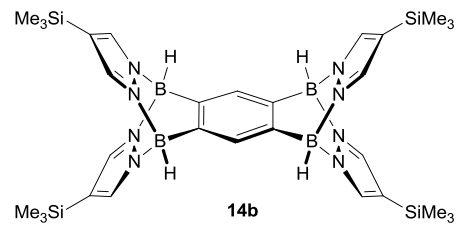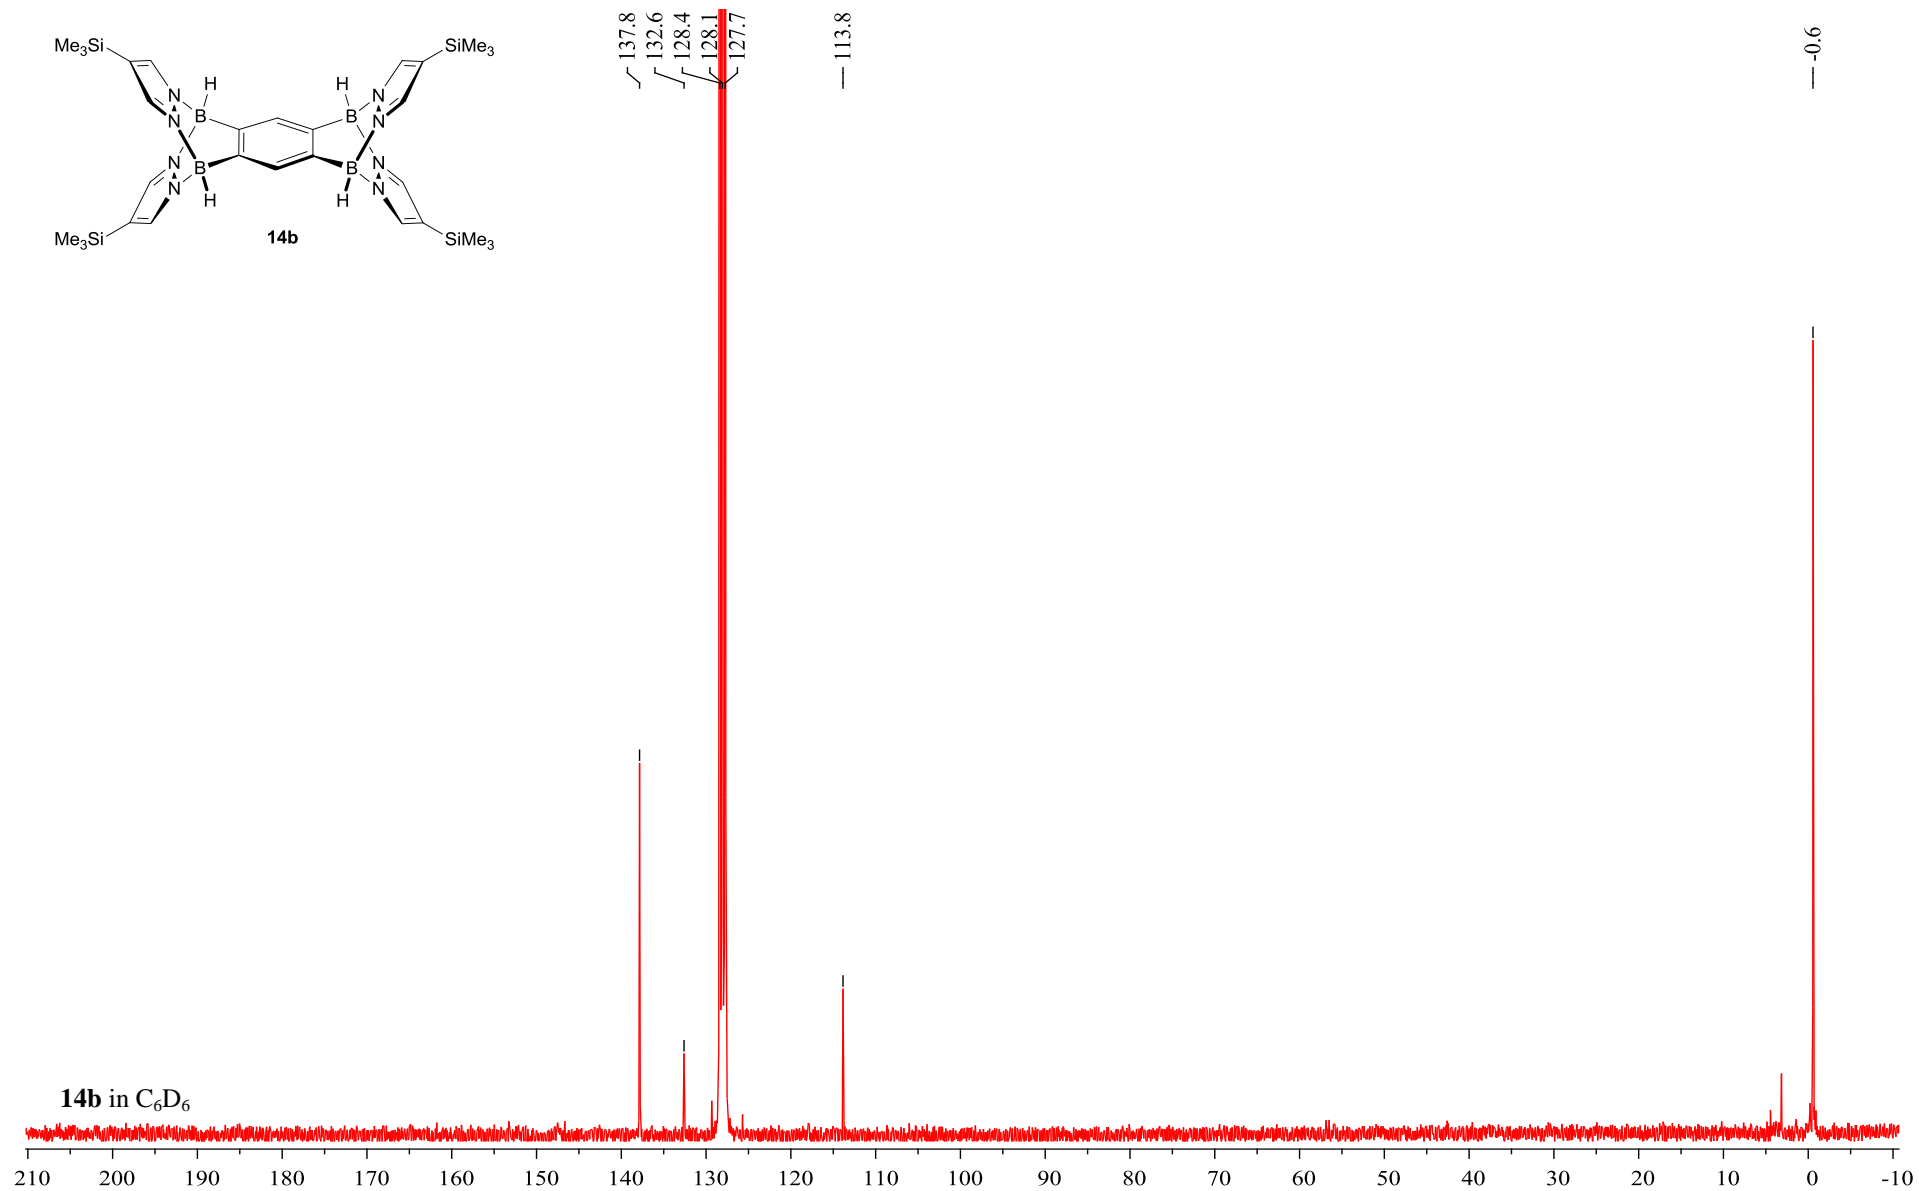

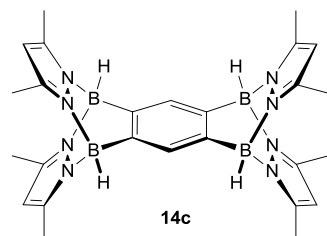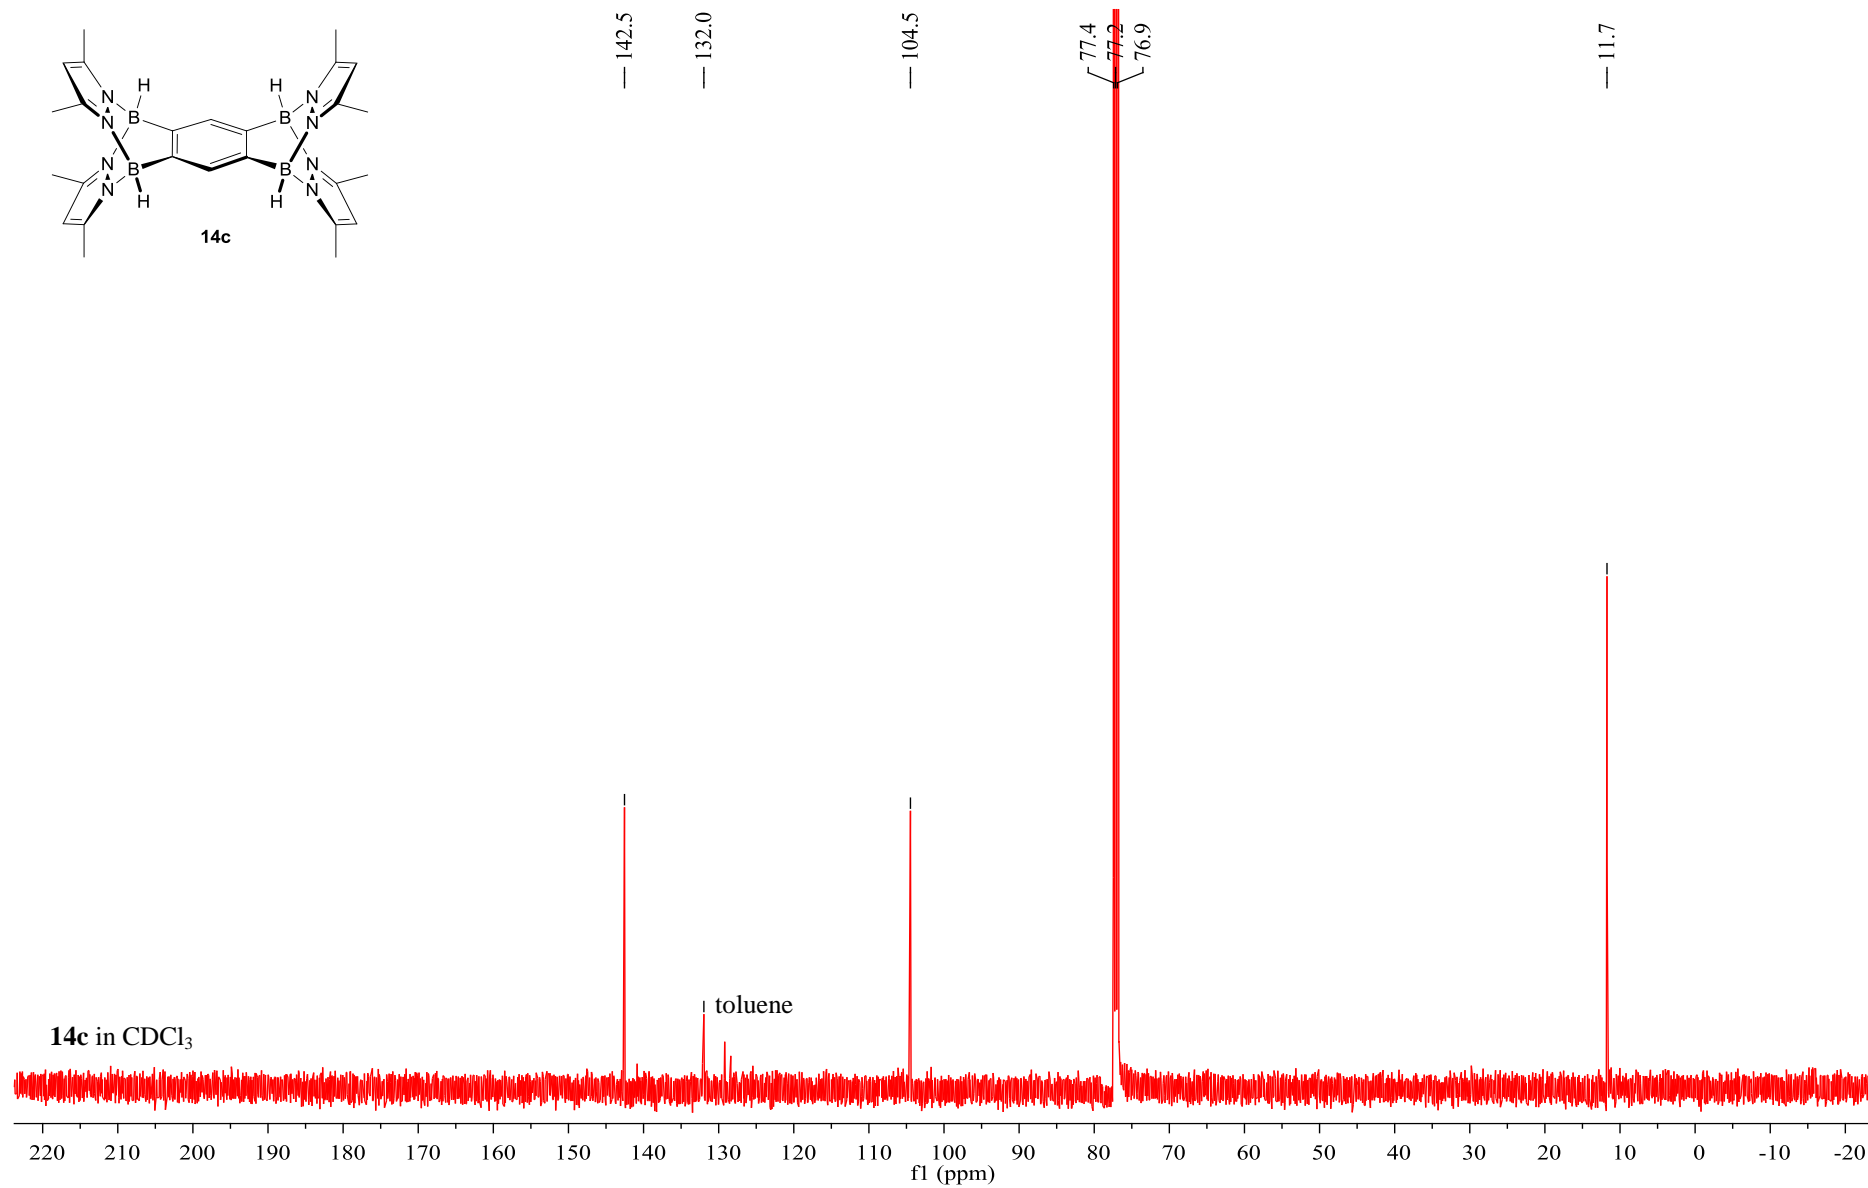

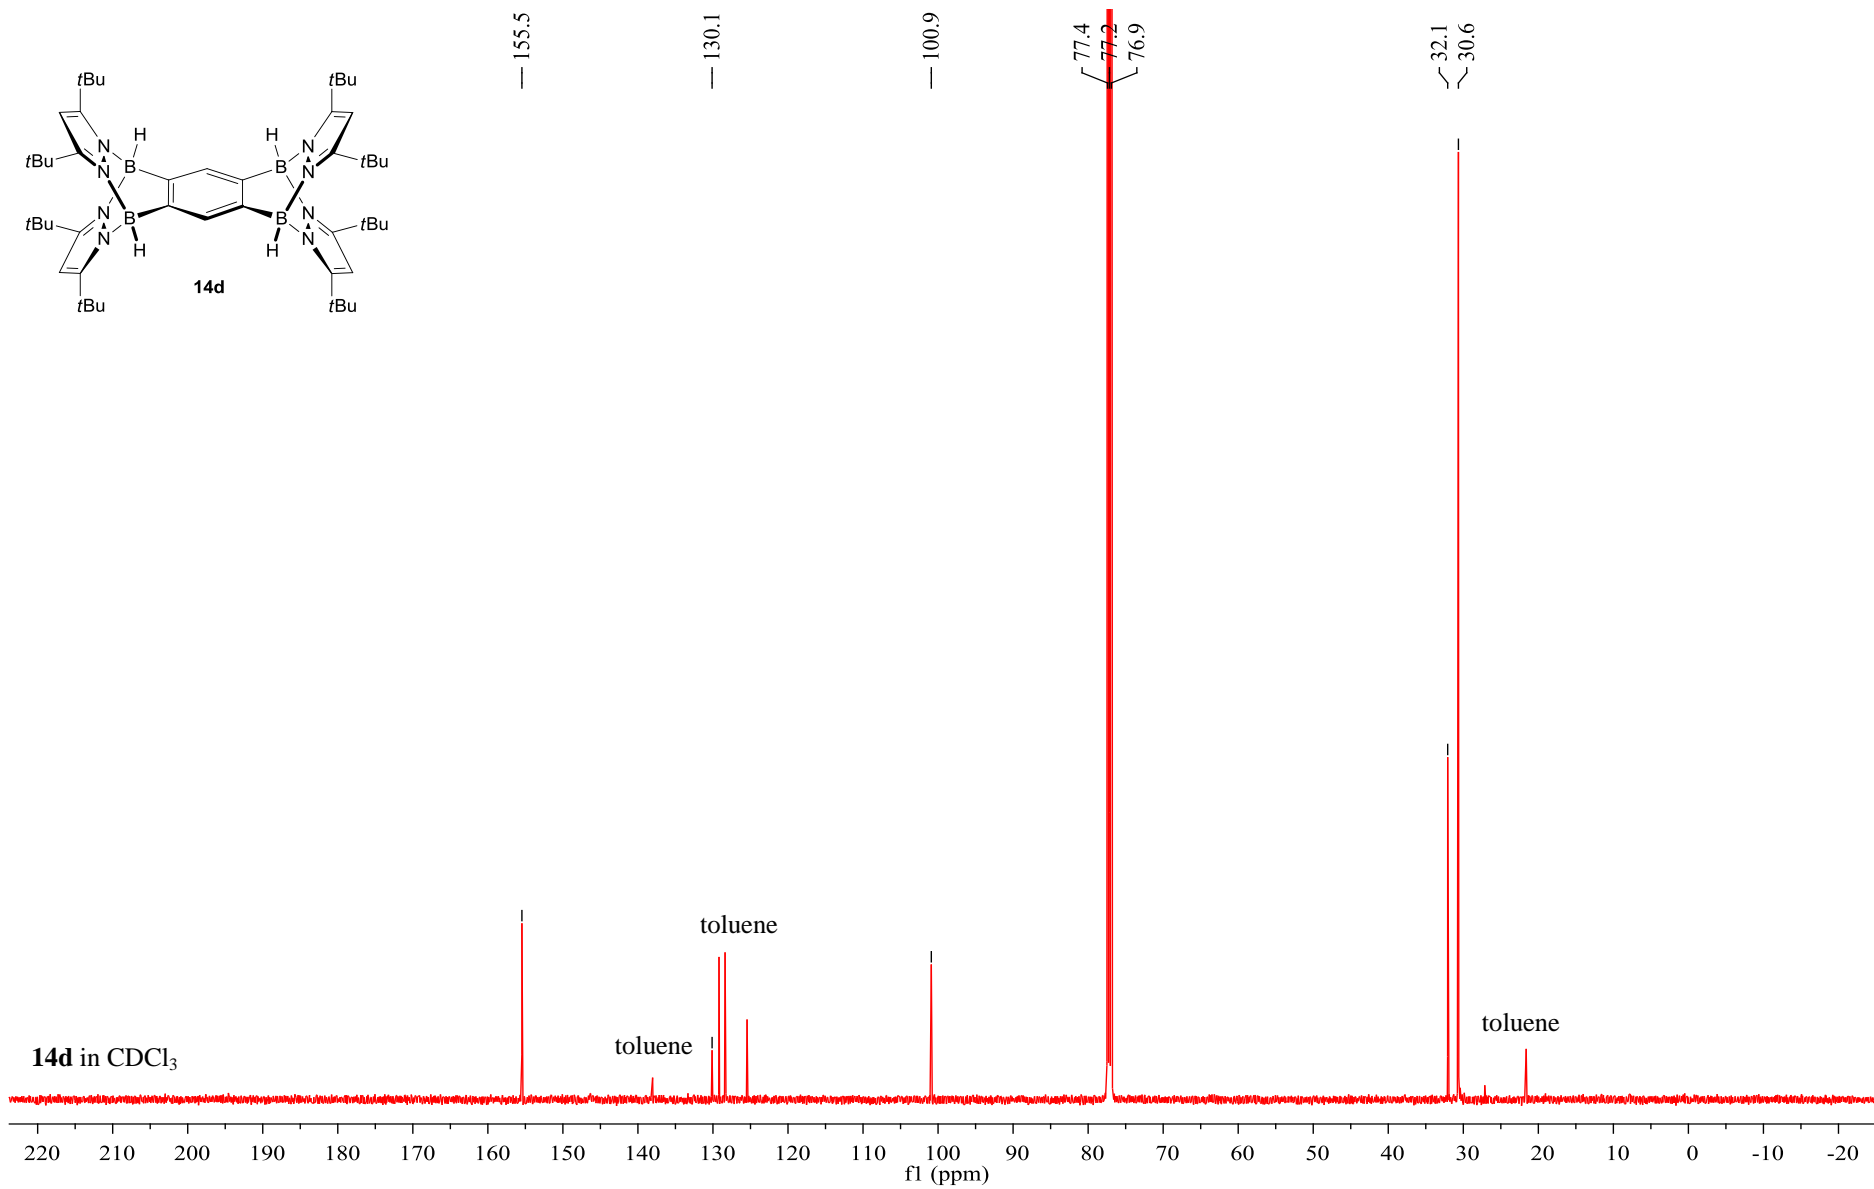

### 3) Decomposition experiments of **3b**, [4a]Br and [4b]Br in CD<sub>3</sub>OD and [4d]Br in CH<sub>3</sub>OH

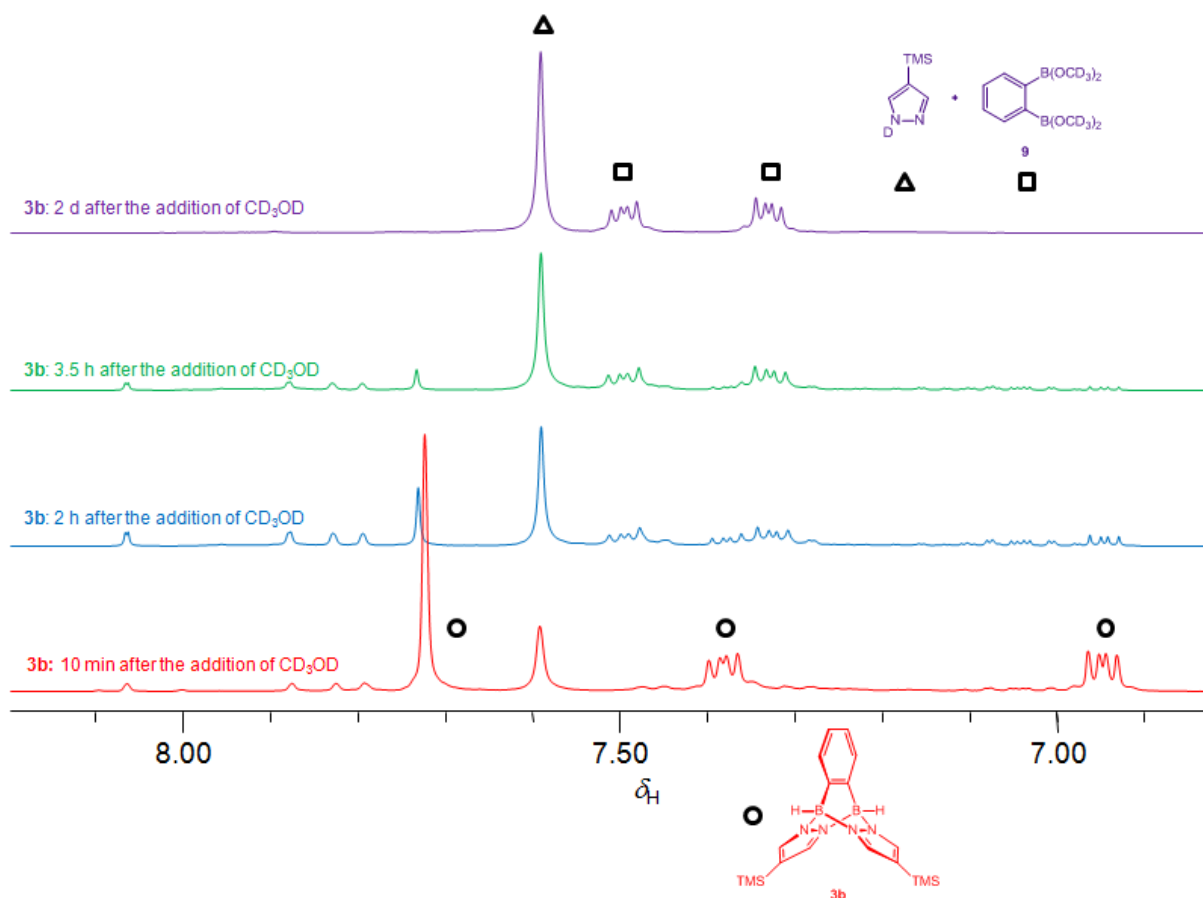

**Figure 1S:** <sup>1</sup>H NMR monitoring study of the slow decomposition of **3b** in non-dried, non-degassed CD<sub>3</sub>OD (note: for simplicity reasons, the decomposition product has been drawn as CD<sub>3</sub>OD ester, even though the corresponding boronic acid or mixed acid/ester species may well be present, too).

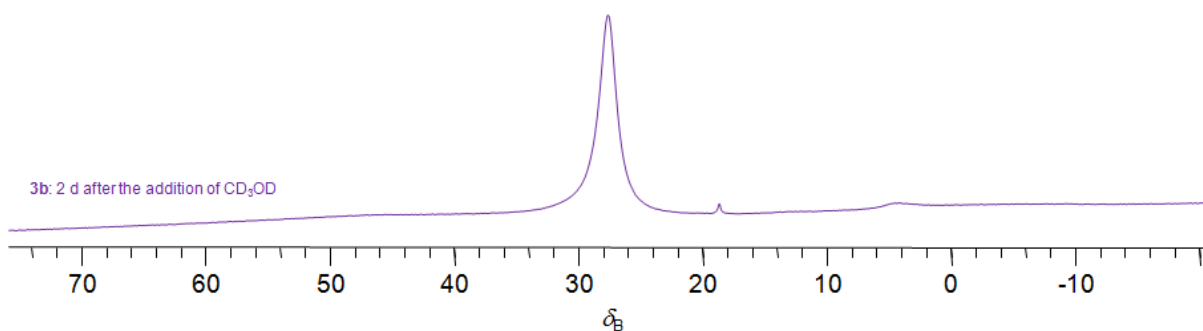

**Figure 2S:** <sup>11</sup>B{<sup>1</sup>H} NMR spectrum of the decomposition mixture resulting from **3b** 2 d after the addition of CD<sub>3</sub>OD.

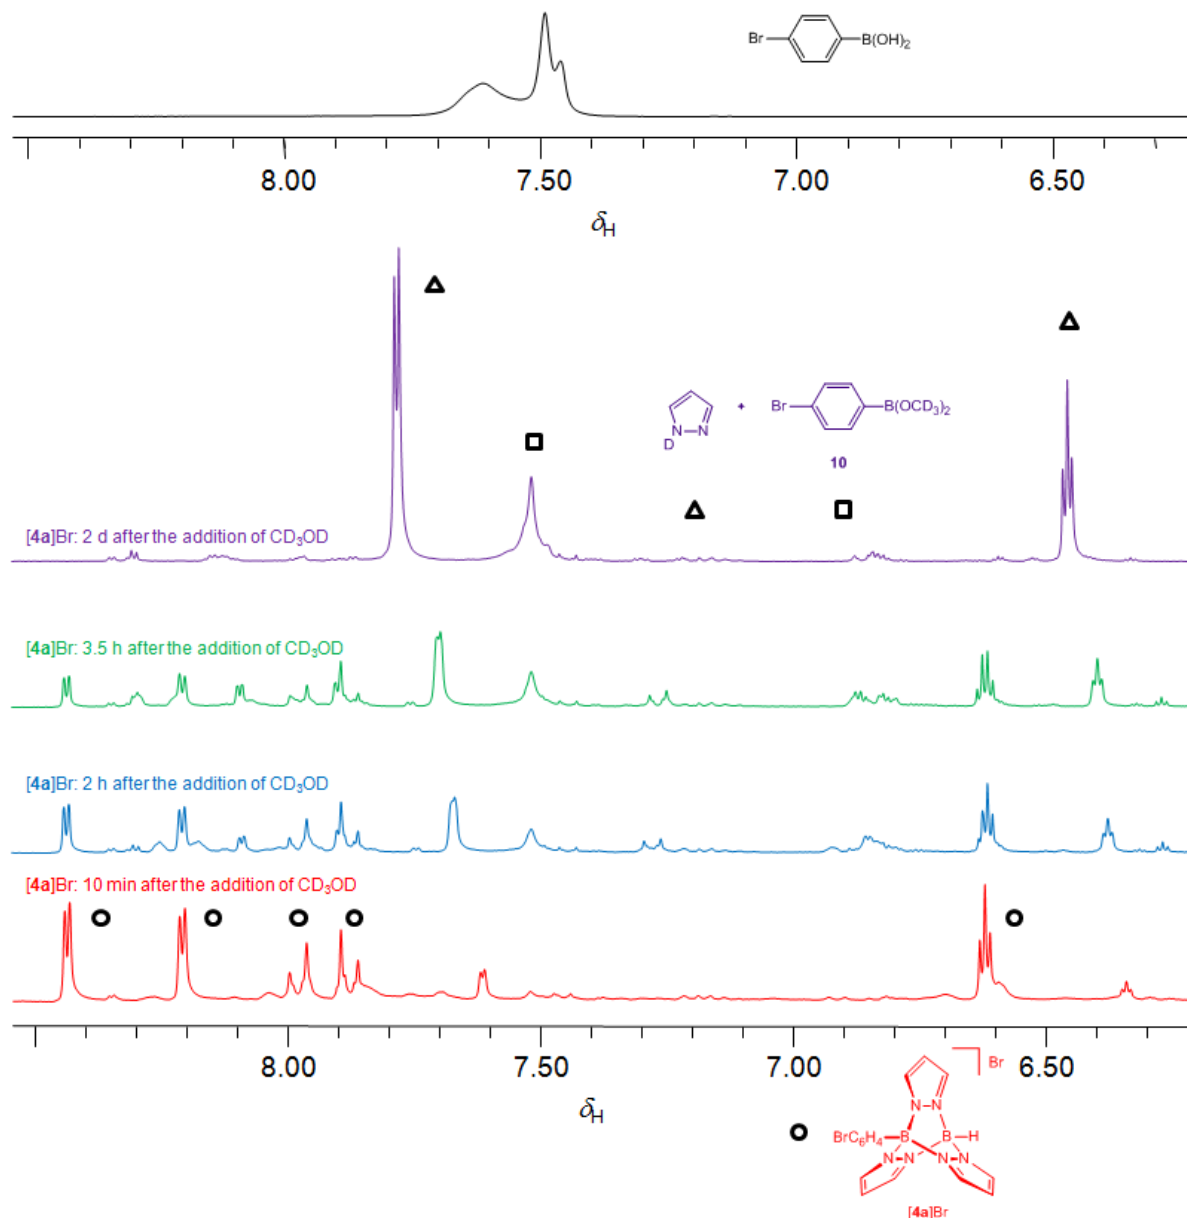

**Figure 3S:**  $^1\text{H}$  NMR spectrum of  $p\text{-BrC}_6\text{H}_4\text{B}(\text{OH})_2$  in  $\text{CD}_3\text{OD}$  (top) and  $^1\text{H}$  NMR monitoring study of the slow decomposition of  $[4a]\text{Br}$  in non-dried, non-degassed  $\text{CD}_3\text{OD}$  (bottom; note: for simplicity reasons, the decomposition product has been drawn as  $\text{CD}_3\text{OD}$  ester, even though the corresponding boronic acid or mixed acid/ester species may well be present, too).

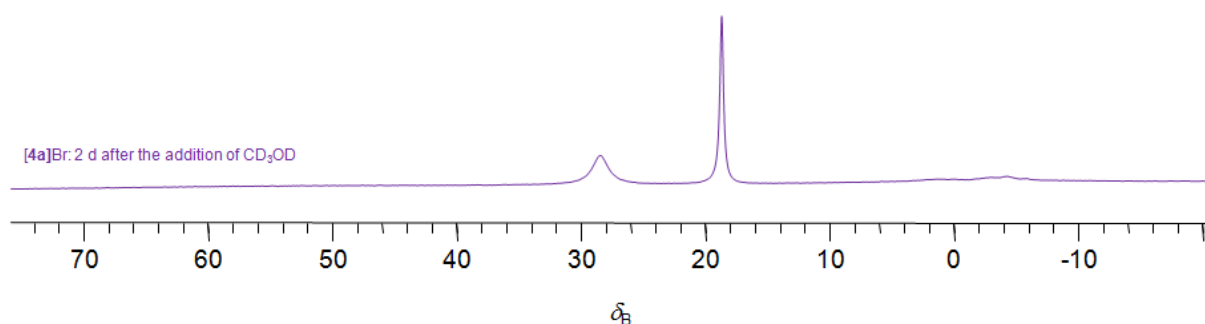

**Figure 4S:**  $^{11}\text{B}\{^1\text{H}\}$  NMR spectrum of the decomposition mixture resulting from  $[4a]\text{Br}$  2 d after the addition of  $\text{CD}_3\text{OD}$ .



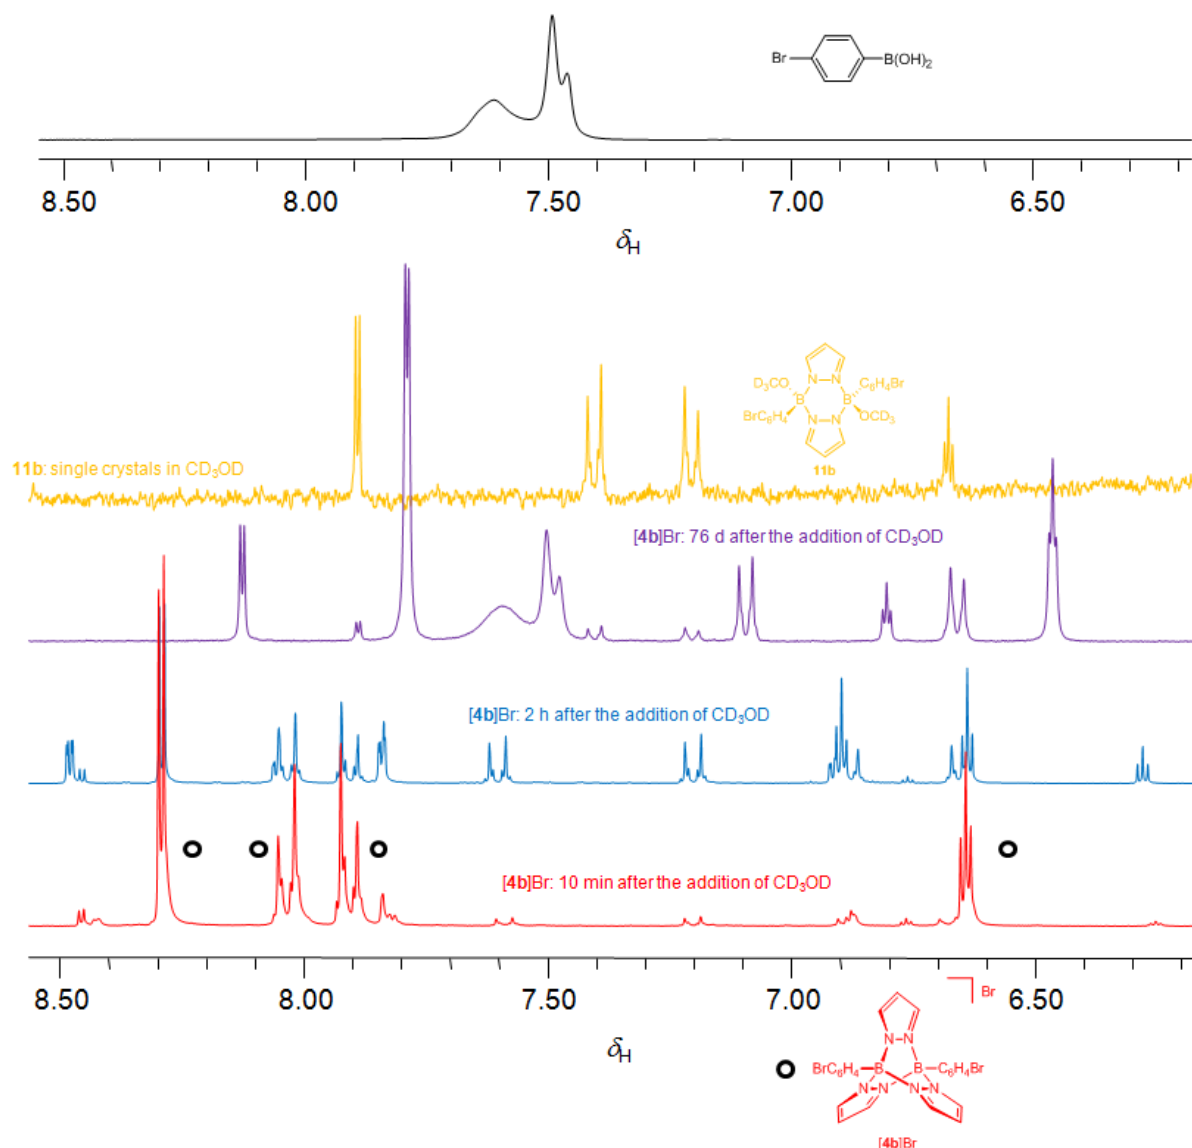

**Figure 5S:**  $^1\text{H}$  NMR spectrum of  $p\text{-BrC}_6\text{H}_4\text{B(OH)}_2$  in  $\text{CD}_3\text{OD}$  (top) and  $^1\text{H}$  NMR monitoring study of the slow decomposition of  $[\mathbf{4b}]\text{Br}$  in non-dried, non-degassed  $\text{CD}_3\text{OD}$  (bottom; note: for simplicity reasons, the decomposition products have been drawn as  $\text{CD}_3\text{OD}$  esters, even though the corresponding boronic acid or mixed acid/ester species may well be present, too).

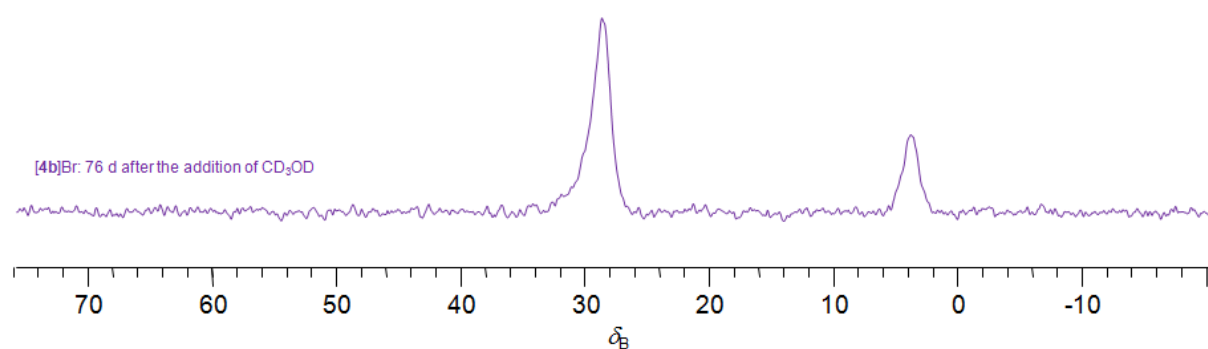

**Figure 6S:**  $^{11}\text{B}\{^1\text{H}\}$  NMR spectrum of the decomposition mixture resulting from  $[\mathbf{4b}]\text{Br}$  76 d after the addition of  $\text{CD}_3\text{OD}$ .

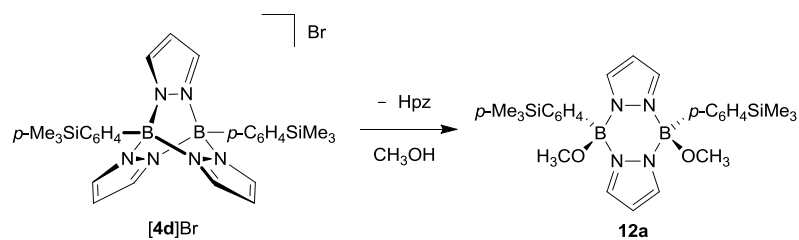

**Scheme 2S:** Decomposition of **[4d]Br** in  $\text{CH}_3\text{OH}$  leads to single crystals of **12a**.

#### 4) X-ray crystal structure analyses of 3c, 3d, 3e, 3f·OEt<sub>2</sub> and 12a

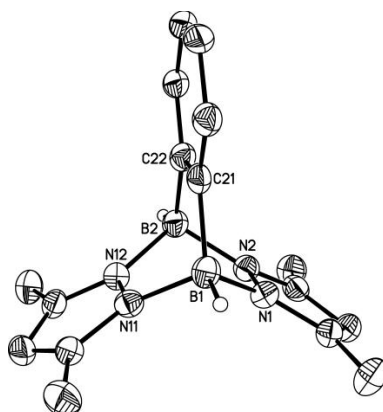

**Figure 7S:** Molecular structure of **3c** in the solid state. Hydrogen atoms except on boron have been omitted for clarity; displacement ellipsoids are drawn at the 50% probability level. Selected bond lengths (Å), atom···atom distance (Å), bond angles (°) and dihedral angles (°): B(1)–N(1) 1.577(4), B(1)–N(11) 1.573(4), B(1)–C(21) 1.611(4), B(2)–N(2) 1.585(4), B(2)–N(12) 1.580(4), B(2)–C(22) 1.607(4), B(1)···B(2) 2.687(5); N(1)–B(1)–N(11) 101.9(2), N(1)–B(1)–C(21) 105.8(2), N(11)–B(1)–C(21) 105.4(2), N(2)–B(2)–N(12) 102.2(2), N(2)–B(2)–C(22) 105.2(2), N(12)–B(2)–C(22) 105.3(2); N(1)B(1)N(11)//N(1)N(2)N(11)N(12) 48.9(2), N(2)B(2)N(12)//N(1)N(2)N(11)N(12) 47.6(2), pz(N(1))//C<sub>6</sub>H<sub>4</sub> 120.9(1), pz(N(11))//C<sub>6</sub>H<sub>4</sub> 119.0(1), pz(N(1))//pz(N(11)) 120.0(1); pz(N(X)) = pyrazolyl ring containing N(X).

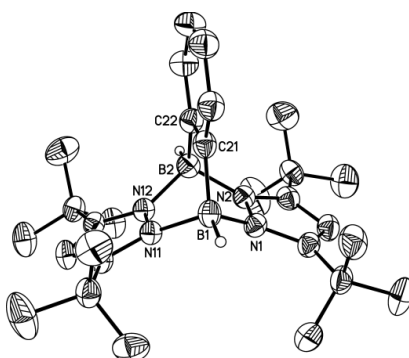

**Figure 8S:** Molecular structure of **3d** in the solid state. Hydrogen atoms except on boron have been omitted for clarity; displacement ellipsoids are drawn at the 50% probability level. Selected bond lengths (Å), atom···atom distance (Å), bond angles (°) and dihedral angles (°): B(1)–N(1) 1.599(3), B(1)–N(11) 1.583(3), B(1)–C(21) 1.586(3), B(2)–N(2) 1.578(3), B(2)–N(12) 1.594(3), B(2)–C(22) 1.607(3), B(1)···B(2) 2.655(3); N(1)–B(1)–N(11) 104.3(2),

$\text{N(1)-B(1)-C(21)}$  106.6(2),  $\text{N(11)-B(1)-C(21)}$  104.8(2),  $\text{N(2)-B(2)-N(12)}$  104.6(2),  
 $\text{N(2)-B(2)-C(22)}$  105.3(2),  $\text{N(12)-B(2)-C(22)}$  106.0(2);  
 $\text{N(1)B(1)N(11)}/\text{N(1)N(2)N(11)N(12)}$  48.1(2),  $\text{N(2)B(2)N(12)}/\text{N(1)N(2)N(11)N(12)}$  50.0(1),  
 $\text{B(1)N(1)N(2)B(2)}/\text{B(1)N(11)N(12)B(2)}$  119.3(1),  $\text{B(1)N(1)N(2)B(2)}/\text{B(1)C(21)C(22)B(2)}$   
 120.6(1),  $\text{B(1)N(11)N(12)B(2)}/\text{B(1)C(21)C(22)B(2)}$  120.0(1),  $\text{pz(N(1))}/\text{C}_6\text{H}_4$  108.3(1),  
 $\text{pz(N(11))}/\text{C}_6\text{H}_4$  109.0(1),  $\text{pz(N(1))}/\text{pz(N(11))}$  141.3(1);  $\text{pz(N(X))}$  = pyrazolyl ring  
 containing N(X).

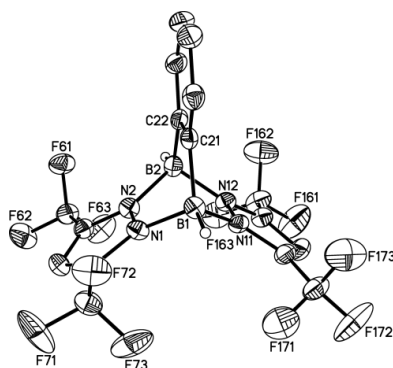

**Figure 9S:** Molecular structure of **3e** in the solid state. Hydrogen atoms except on boron have been omitted for clarity; displacement ellipsoids are drawn at the 50% probability level. Selected bond lengths (Å), atom...atom distance (Å), bond angles (°) and dihedral angles (°):  $\text{B(1)-N(1)}$  1.594(4),  $\text{B(1)-N(11)}$  1.609(4),  $\text{B(1)-C(21)}$  1.603(4),  $\text{B(2)-N(2)}$  1.599(4),  $\text{B(2)-N(12)}$  1.586(4),  $\text{B(2)-C(22)}$  1.587(5),  $\text{B(1)⋯B(2)}$  2.707(5);  $\text{N(1)-B(1)-N(11)}$  99.5(2),  $\text{N(1)-B(1)-C(21)}$  104.8(2),  $\text{N(11)-B(1)-C(21)}$  106.1(2),  $\text{N(2)-B(2)-N(12)}$  99.8(2),  $\text{N(2)-B(2)-C(22)}$  106.0(2),  $\text{N(12)-B(2)-C(22)}$  105.8(2);  $\text{N(1)B(1)N(11)}/\text{N(1)N(2)N(11)N(12)}$  49.1(2),  $\text{N(2)B(2)N(12)}/\text{N(1)N(2)N(11)N(12)}$  48.8(2),  $\text{pz(N(1))}/\text{C}_6\text{H}_4$  121.1(1),  $\text{pz(N(11))}/\text{C}_6\text{H}_4$  122.6(1),  $\text{pz(N(1))}/\text{pz(N(11))}$  116.2(1);  $\text{pz(N(X))}$  = pyrazolyl ring containing N(X).

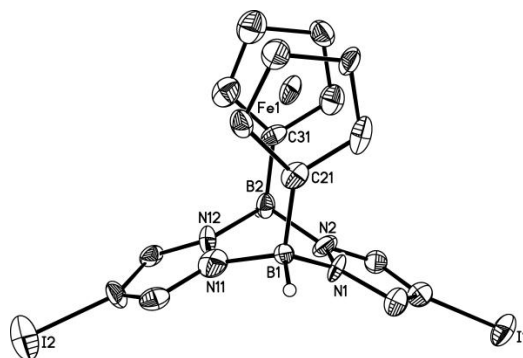

**Figure 10S:** Molecular structure of **3f**·OEt<sub>2</sub> in the solid state. Hydrogen atoms except on boron and the OEt<sub>2</sub> molecule have been omitted for clarity; displacement ellipsoids are drawn at the 50% probability level. The bond lengths and bond angles are not given due to poor crystallographic data, which lead to large error margins.

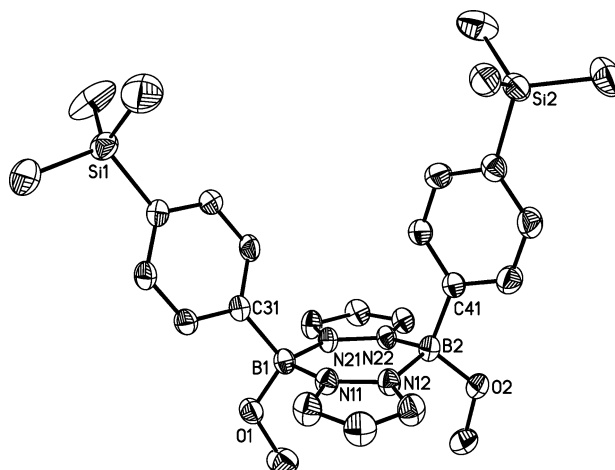

**Figure 11S:** Molecular structure of **12a** in the solid state. Hydrogen atoms have been omitted for clarity; displacement ellipsoids are drawn at the 50% probability level. Selected bond lengths (Å), atom···atom distances (Å), bond angles (°) and dihedral angles (°):

B(1)–O(1) 1.432(3), B(1)–N(11) 1.592(3), B(1)–N(21) 1.586(3), B(1)–C(31) 1.609(3),  
 B(2)–O(2) 1.426(3), B(2)–N(12) 1.588(3), B(2)–N(22) 1.578(3), B(2)–C(41) 1.611(3),  
 B(1)···B(2) 3.272(4), COG(Ar(C(31)))···COG(Ar(C(41))) 6.074; N(11)–B(1)–N(21) 104.9(2),  
 N(12)–B(2)–N(22) 104.7(2); N(11)B(1)N(21)//N(12)B(2)N(22) 13.4(2),  
 N(11)B(1)N(21)//N(11)N(12)N(21)N(22) 1.6(1), N(12)B(2)N(22)//N(11)N(12)N(21)N(22)  
 14.6(2), B(1)N(11)N(12)B(2)//B(1)N(21)N(22)B(2) 169.8(2), pz(N(11))//pz(N(21)) 171.4(1),  
 Ar(C(31))//Ar(C(41)) 70.91(9); pz(N(X)) = pyrazolyl ring containing N(X); Ar(C(X)) = aryl  
 ring containing C(X); COG(Ar(C(X))) = centroid of the aryl ring containing C(X).

**Table 1S:** Crystallographic Data for **3c**, **3d** and **3e**.

|                                                                             | <b>3c</b>                                                     | <b>3d</b>                                                     | <b>3e</b>                                                                    |
|-----------------------------------------------------------------------------|---------------------------------------------------------------|---------------------------------------------------------------|------------------------------------------------------------------------------|
| Formula                                                                     | C <sub>16</sub> H <sub>20</sub> B <sub>2</sub> N <sub>4</sub> | C <sub>28</sub> H <sub>44</sub> B <sub>2</sub> N <sub>4</sub> | C <sub>16</sub> H <sub>8</sub> B <sub>2</sub> F <sub>12</sub> N <sub>4</sub> |
| <i>M</i> <sub>r</sub>                                                       | 289.98                                                        | 458.29                                                        | 505.88                                                                       |
| Colour, shape                                                               | Colourless, plate                                             | Colourless, plate                                             | Colourless, plate                                                            |
| <i>T</i> [K]                                                                | 173(2)                                                        | 173(2)                                                        | 173(2)                                                                       |
| Radiation, $\lambda$ [Å]                                                    | MoK $\alpha$ , 0.71073                                        | MoK $\alpha$ , 0.71073                                        | MoK $\alpha$ , 0.71073                                                       |
| Crystal system                                                              | Triclinic                                                     | Monoclinic                                                    | Monoclinic                                                                   |
| Space group                                                                 | <i>P</i> −1                                                   | <i>P</i> 2 <sub>1</sub> / <i>n</i>                            | <i>P</i> 2 <sub>1</sub> / <i>n</i>                                           |
| <i>a</i> [Å]                                                                | 7.9633(10)                                                    | 10.6013(7)                                                    | 9.6394(8)                                                                    |
| <i>b</i> [Å]                                                                | 8.5150(11)                                                    | 9.5489(6)                                                     | 15.7965(13)                                                                  |
| <i>c</i> [Å]                                                                | 12.6954(17)                                                   | 28.2614(17)                                                   | 12.9452(12)                                                                  |
| $\alpha$ [°]                                                                | 71.470(10)                                                    | 90                                                            | 90                                                                           |
| $\beta$ [°]                                                                 | 81.729(11)                                                    | 99.567(5)                                                     | 101.491(7)                                                                   |
| $\gamma$ [°]                                                                | 77.430(10)                                                    | 90                                                            | 90                                                                           |
| <i>V</i> [Å <sup>3</sup> ]                                                  | 794.05(19)                                                    | 2821.1(3)                                                     | 1931.6(3)                                                                    |
| <i>Z</i>                                                                    | 2                                                             | 4                                                             | 4                                                                            |
| <i>D</i> <sub>calcd</sub> [g cm <sup>−3</sup> ]                             | 1.213                                                         | 1.079                                                         | 1.740                                                                        |
| <i>F</i> (000)                                                              | 308                                                           | 1000                                                          | 1000                                                                         |
| $\mu$ [mm <sup>−1</sup> ]                                                   | 0.073                                                         | 0.063                                                         | 0.186                                                                        |
| Crystal size [mm <sup>3</sup> ]                                             | 0.20 × 0.20 × 0.05                                            | 0.18 × 0.13 × 0.07                                            | 0.20 × 0.20 × 0.10                                                           |
| Rflns collected                                                             | 8359                                                          | 20700                                                         | 29995                                                                        |
| Independent rflns ( <i>R</i> <sub>int</sub> )                               | 2787 (0.0571)                                                 | 5184 (0.0888)                                                 | 3832 (0.1243)                                                                |
| Data/restraints/parameters                                                  | 2787/0/211                                                    | 5184/0/313                                                    | 3832/0/315                                                                   |
| GOF on <i>F</i> <sup>2</sup>                                                | 1.239                                                         | 0.923                                                         | 1.155                                                                        |
| <i>R</i> <sub>1</sub> , <i>wR</i> <sub>2</sub> [ <i>I</i> > 2σ( <i>I</i> )] | 0.0648, 0.1601                                                | 0.0518, 0.1036                                                | 0.0755, 0.1265                                                               |
| <i>R</i> <sub>1</sub> , <i>wR</i> <sub>2</sub> (all data)                   | 0.0823, 0.1655                                                | 0.0990, 0.1171                                                | 0.1027, 0.1371                                                               |
| Largest diff. peak and hole [e Å <sup>−3</sup> ]                            | 0.227, −0.256                                                 | 0.209, −0.218                                                 | 0.289, −0.256                                                                |

**Table 2S:** Crystallographic Data for **3f**·OEt<sub>2</sub> and **12a**.

|                                                                             | <b>3f</b> ·OEt <sub>2</sub>                                                                                          | <b>12a</b>                                                                                   |
|-----------------------------------------------------------------------------|----------------------------------------------------------------------------------------------------------------------|----------------------------------------------------------------------------------------------|
| Formula                                                                     | C <sub>16</sub> H <sub>14</sub> B <sub>2</sub> FeI <sub>2</sub> N <sub>4</sub> ·<br>C <sub>4</sub> H <sub>10</sub> O | C <sub>26</sub> H <sub>38</sub> B <sub>2</sub> N <sub>4</sub> O <sub>2</sub> Si <sub>2</sub> |
| <i>M</i> <sub>r</sub>                                                       | 667.70                                                                                                               | 516.40                                                                                       |
| Colour, shape                                                               | Yellow, needle                                                                                                       | Colourless, needle                                                                           |
| <i>T</i> [K]                                                                | 173(2)                                                                                                               | 173(2)                                                                                       |
| Radiation, $\lambda$ [Å]                                                    | MoK $\alpha$ , 0.71073                                                                                               | MoK $\alpha$ , 0.71073                                                                       |
| Crystal system                                                              | Monoclinic                                                                                                           | Monoclinic                                                                                   |
| Space group                                                                 | <i>P</i> 2 <sub>1</sub> / <i>c</i>                                                                                   | <i>P</i> 2 <sub>1</sub> / <i>c</i>                                                           |
| <i>a</i> [Å]                                                                | 11.061(3)                                                                                                            | 12.4434(10)                                                                                  |
| <i>b</i> [Å]                                                                | 7.8312(14)                                                                                                           | 20.6663(13)                                                                                  |
| <i>c</i> [Å]                                                                | 27.648(9)                                                                                                            | 12.4374(11)                                                                                  |
| $\alpha$ [°]                                                                | 90                                                                                                                   | 90                                                                                           |
| $\beta$ [°]                                                                 | 98.73(2)                                                                                                             | 109.677(6)                                                                                   |
| $\gamma$ [°]                                                                | 90                                                                                                                   | 90                                                                                           |
| <i>V</i> [Å <sup>3</sup> ]                                                  | 2367.1(11)                                                                                                           | 3011.6(4)                                                                                    |
| <i>Z</i>                                                                    | 4                                                                                                                    | 4                                                                                            |
| <i>D</i> <sub>calcd</sub> [g cm <sup>-3</sup> ]                             | 1.874                                                                                                                | 1.139                                                                                        |
| <i>F</i> (000)                                                              | 1288                                                                                                                 | 1104                                                                                         |
| $\mu$ [mm <sup>-1</sup> ]                                                   | 3.265                                                                                                                | 0.146                                                                                        |
| Crystal size [mm <sup>3</sup> ]                                             | 0.15 × 0.01 × 0.01                                                                                                   | 0.52 × 0.10 × 0.10                                                                           |
| Rflns collected                                                             | 18238                                                                                                                | 20886                                                                                        |
| Independent rflns ( <i>R</i> <sub>int</sub> )                               | 4568 (0.2756)                                                                                                        | 5851 (0.0898)                                                                                |
| Data/restraints/parameters                                                  | 4568/162/271                                                                                                         | 5851/0/325                                                                                   |
| GOF on <i>F</i> <sup>2</sup>                                                | 0.998                                                                                                                | 1.030                                                                                        |
| <i>R</i> <sub>1</sub> , <i>wR</i> <sub>2</sub> [ <i>I</i> > 2σ( <i>I</i> )] | 0.1148, 0.1924                                                                                                       | 0.0777, 0.1489                                                                               |
| <i>R</i> <sub>1</sub> , <i>wR</i> <sub>2</sub> (all data)                   | 0.2363, 0.2362                                                                                                       | 0.0994, 0.1584                                                                               |
| Largest diff. peak<br>and hole [e Å <sup>-3</sup> ]                         | 1.165, -1.555                                                                                                        | 0.300, -0.326                                                                                |
